# Supplementary material for: Miniature Neurotransmission Regulates Drosophila Synaptic Structural Maturation
Source: PubMed Central journal article supplement — Neuron. 2014 May 7;82(3):618–34. doi: 10.1016/j.neuron.2014.03.012 (PMC4022839; doi:10.1016/j.neuron.2014.03.012), 2014-05-07
Supplement: mmc1.pdf [file mmc1.pdf]

Neuron, Volume 82

Supplemental Information

## **Miniature Neurotransmission Regulates**

## ***Drosophila* Synaptic Structural Maturation**

Ben Jiwon Choi, Wendy L. Imlach, Wei Jiao, Verena Wolfram, Ying Wu, Mark  
Grbic, Carolina Cela, Richard A. Baines, Michael N. Nitabach, and Brian D. McCabe

| Abbreviation                                                      | Genotype                                                                                                                                                               | N # | Control                                                                                      | Synaptic Terminal Area ( $\mu\text{m}^2$ )<br>(Significance vs Control) | Number of typical synaptic bouton (number)<br>(Significance vs Control) | Number of small synaptic bouton (number)<br>(Significance vs Control) | Bouton size index (number)<br>(Significance vs Control) |
|-------------------------------------------------------------------|------------------------------------------------------------------------------------------------------------------------------------------------------------------------|-----|----------------------------------------------------------------------------------------------|-------------------------------------------------------------------------|-------------------------------------------------------------------------|-----------------------------------------------------------------------|---------------------------------------------------------|
| <b>Control(toxin) CS</b>                                          | CantonS                                                                                                                                                                | 48  | <b>N/A</b>                                                                                   | 292.4 $\pm$ 7.976                                                       | 24.000 $\pm$ 0.672                                                      | 2.878 $\pm$ 0.301                                                     | 0.1254 $\pm$ 0.0146                                     |
| <b>UAS-TeTxLC</b>                                                 | UAS-TeTxLC/OK319-Gal4                                                                                                                                                  | 54  | <b>CS</b>                                                                                    | 300.09 $\pm$ 8.574 (ns)                                                 | 24.056 $\pm$ 0.690 (ns)                                                 | 3.333 $\pm$ 0.400 (ns)                                                | 0.1511 $\pm$ 0.0205 (ns)                                |
| <b>UAS-PLTXII</b>                                                 | OK6-Gal4/+;+UAS-PLTXII                                                                                                                                                 | 39  | <b>CS</b>                                                                                    | 301.84 $\pm$ 7.674 (ns)                                                 | 23.556 $\pm$ 0.537 (ns)                                                 | 2.143 $\pm$ 0.229 (ns)                                                | 0.0921 $\pm$ 0.0111 (ns)                                |
| <b>Control(vglut) vglut<sup>Df/+</sup></b>                        | Vglut <sup>OK371<math>\Delta</math>D</sup> /+                                                                                                                          | 37  | <b>N/A</b>                                                                                   | 347.79 $\pm$ 8.283                                                      | 34.162 $\pm$ 0.857                                                      | 4.000 $\pm$ 0.365                                                     | 0.1215 $\pm$ 0.0125                                     |
| <b>vglut<sup>MN</sup></b>                                         | vglut <sup>1</sup> /vglut <sup>OK371<math>\Delta</math>D</sup> , UAS-Vglut-RNAi <sup>JF02689</sup> ; D42-Gal4/UAS-Vglut-RNAi <sup>VDRRC104324</sup>                    | 30  | <b>vglut<sup>Df/+</sup></b>                                                                  | 263.02 $\pm$ 8.734 (***)                                                | 22.967 $\pm$ 0.702 (***)                                                | 9.433 $\pm$ 0.974 (***)                                               | 0.4447 $\pm$ 0.0543 (***)                               |
| <b>Vglut-RNAi#1</b>                                               | UAS-Vglut-RNAi <sup>VDRRC104324</sup> /+; UAS-Vglut-RNAi <sup>JF02689</sup> /D42-Gal4                                                                                  | 33  | <b>CS</b>                                                                                    | 271.09 $\pm$ 4.996 (*)                                                  | 21.879 $\pm$ 0.701 (*)                                                  | 5.827 $\pm$ 0.665 (***)                                               | 0.2508 $\pm$ 0.0340 (**)                                |
| <b>Vglut-RNAi#2</b>                                               | OK6-Gal4/+;D42-Gal4/UAS-Vglut-RNAi <sup>HMS02011</sup>                                                                                                                 | 32  | <b>CS</b>                                                                                    | 263.65 $\pm$ 8.578 (*)                                                  | 20.000 $\pm$ 0.743 (***)                                                | 6.281 $\pm$ 0.570 (***)                                               | 0.3426 $\pm$ 0.0382 (***)                               |
| <b>vglut<sup>Hypo</sup></b>                                       | vglut <sup>1</sup> /vglut <sup>OK371<math>\Delta</math>D</sup>                                                                                                         | 48  | <b>vglut<sup>Df/+</sup></b>                                                                  | 302.21 $\pm$ 4.204 (***)                                                | 27.021 $\pm$ 0.633 (***)                                                | 6.292 $\pm$ 0.478 (**)                                                | 0.2368 $\pm$ 0.0182 (***)                               |
| <b>vglut<sup>Hypo</sup> + UAS-Vglut</b>                           | vglut <sup>1</sup> , OK319-Gal4/vglut <sup>OK371<math>\Delta</math>D</sup> , +UAS-Vglut                                                                                | 24  | <b>vglut<sup>Df/+</sup></b>                                                                  | 359.34 $\pm$ 20.947 (ns)                                                | 30.435 $\pm$ 1.002 (**)                                                 | 3.150 $\pm$ 0.399 (ns)                                                | 0.0905 $\pm$ 0.0134 (ns)                                |
| <b>Control (Fig.2) dgluRIIA<sup>+/+</sup>, IIB<sup>Df/-</sup></b> | dglurIIA, IIB <sup>sp22</sup> ; Df(2L)cl <sup>h4</sup> ; genomic-dglurIIA/+                                                                                            | 44  | <b>N/A</b>                                                                                   | 302.83 $\pm$ 6.05                                                       | 32.886 $\pm$ 0.927                                                      | 2.136 $\pm$ 0.267                                                     | 0.06784 $\pm$ 0.0091                                    |
| <b>dgluRIIA<sup>Hypol-</sup>, IIB<sup>Df/-</sup></b>              | dglurIIA, IIB <sup>sp22</sup> ; Df(2L)cl <sup>h4</sup> ; genomic-dglurIIA $\Delta$ 3UTR                                                                                |     |                                                                                              |                                                                         |                                                                         |                                                                       |                                                         |
| <b>iGluR<sup>WT</sup></b>                                         | dglurIIA, IIB <sup>sp22</sup> ; Df(2L)cl <sup>h4</sup> ; genomic-dglurIIA $\Delta$ 3UTR; genomic-dglurIIA <sup>WT</sup> /+                                             | 59  | <b>dgluRIIA<sup>+/+</sup>, IIB<sup>Df/-</sup></b>                                            | 318.25 $\pm$ 6.910 (ns)                                                 | 30.862 $\pm$ 0.683 (ns)                                                 | 2.259 $\pm$ 0.253 (ns)                                                | 0.07391 $\pm$ 0.00864 (ns)                              |
| <b>iGluR<sup>MUT</sup></b>                                        | dglurIIA, IIB <sup>sp22</sup> ; Df(2L)cl <sup>h4</sup> ; genomic-dglurIIA $\Delta$ 3UTR; genomic-dglurIIA <sup>E783A</sup> /+                                          | 53  | <b>dgluRIIA<sup>+/+</sup>, IIB<sup>Df/-</sup> (Fig. 2) iGluR<sup>WT</sup> (Fig. 3,5,7,8)</b> | 231.12 $\pm$ 7.906 (***)                                                | 19.850 $\pm$ 0.843 (***)                                                | 6.025 $\pm$ 0.541 (***)                                               | 0.3272 $\pm$ 0.0330 (***)                               |
| <b>iGluR<sup>MUT</sup> + UAS-dGluR<sup>WT</sup></b>               | dglurIIA, IIB <sup>sp22</sup> ; G14-Gal4/Df(2L)cl <sup>h4</sup> ; genomic-dglurIIA $\Delta$ 3UTR; genomic-dglurIIA <sup>E783A</sup> /UAS-dglurIIA                      | 22  | <b>dgluRIIA<sup>+/+</sup>, IIB<sup>Df/-</sup></b>                                            | 345.16 $\pm$ 11.512 (***)                                               | 27.773 $\pm$ 0.822 (**)                                                 | 3.421 $\pm$ 0.650 (ns)                                                | 0.1161 $\pm$ 0.0298 (ns)                                |
| <b>iGluR<sup>MUT</sup> + UAS-CamKII<sup>Act</sup></b>             | dglurIIA, IIB <sup>sp22</sup> ; G14-Gal4/Df(2L)cl <sup>h4</sup> ; genomic-dglurIIA $\Delta$ 3UTR; genomic-dglurIIA <sup>E783A</sup> /UAS-CamKII <sup>T287D</sup>       | 17  | <b>iGluR<sup>WT</sup></b>                                                                    | 260.65 $\pm$ 14.480 (**)                                                | 22.824 $\pm$ 0.892 (***)                                                | 9.823 $\pm$ 0.792 (***)                                               | 0.4483 $\pm$ 0.0473 (***)                               |
| <b>iGluR<sup>MUT</sup> + UAS-CamKII<sup>Inh</sup></b>             | dglurIIA, IIB <sup>sp22</sup> ; G14-Gal4/Df(2L)cl <sup>h4</sup> ; genomic-dglurIIA $\Delta$ 3UTR; genomic-dglurIIA <sup>E783A</sup> /UAS-CamKII <sup>Ntide</sup>       | 19  | <b>iGluR<sup>WT</sup></b>                                                                    | 260.64 $\pm$ 10.837 (***)                                               | 20.842 $\pm$ 0.922 (***)                                                | 8.684 $\pm$ 0.722 (***)                                               | 0.4377 $\pm$ 0.0415 (***)                               |
| <b>iGluR<sup>MUT</sup> + UAS-PLTXII</b>                           | dglurIIA, IIB <sup>sp22</sup> ; OK319-Gal4/Df(2L)cl <sup>h4</sup> ; genomic-dglurIIA $\Delta$ 3UTR; genomic-dglurIIA <sup>E783A</sup> /UAS-PLTXII                      | 36  | <b>iGluR<sup>WT</sup></b>                                                                    | 240.60 $\pm$ 10.122 (***)                                               | 20.721 $\pm$ 0.661 (***)                                                | 6.932 $\pm$ 0.505 (***)                                               | 0.3276 $\pm$ 0.0252 (***)                               |
| <b>iGluR<sup>MUT</sup> + UAS-<math>\delta</math>ACTX</b>          | dglurIIA, IIB <sup>sp22</sup> ; OK319-Gal4/Df(2L)cl <sup>h4</sup> ; genomic-dglurIIA $\Delta$ 3UTR; genomic-dglurIIA <sup>E783A</sup> /UAS- $\delta$ ACTX              | 27  | <b>iGluR<sup>WT</sup></b>                                                                    | 252.36 $\pm$ 14.182 (***)                                               | 21.96 $\pm$ 1.194 (***)                                                 | 6.231 $\pm$ 0.939 (***)                                               | 0.2819 $\pm$ 0.0423 (***)                               |
| <b>iGluR<sup>MUT</sup> + UAS-rGluK2</b>                           | dglurIIA, IIB <sup>sp22</sup> ; G14-Gal4/Df(2L)cl <sup>h4</sup> ; genomic-dglurIIA $\Delta$ 3UTR; genomic-dglurIIA <sup>E783A</sup> /UAS-rGluK2                        | 41  | <b>iGluR<sup>WT</sup></b>                                                                    | 331.91 $\pm$ 6.168 (ns)                                                 | 27.780 $\pm$ 0.693 (**)                                                 | 4.268 $\pm$ 0.446 (***)                                               | 0.1553 $\pm$ 0.01610 (***)                              |
| <b>iGluR<sup>MUT</sup> + UAS-rGluK2 + UAS-PLTXII</b>              | dglurIIA, IIB <sup>sp22</sup> ; G14-Gal4, OK319-Gal4/Df(2L)cl <sup>h4</sup> ; genomic-dglurIIA $\Delta$ 3UTR; genomic-dglurIIA <sup>E783A</sup> /UAS-PLTXII/UAS-rGluK2 | 34  | <b>iGluR<sup>WT</sup></b>                                                                    | 318.95 $\pm$ 9.954 (ns)                                                 | 27.647 $\pm$ 0.736 (**)                                                 | 4.206 $\pm$ 0.372 (***)                                               | 0.1568 $\pm$ 0.01447 (***)                              |
| <b>UAS-PLTXII (muscle)</b>                                        | G14-Gal4/+;+UAS-PLTXII                                                                                                                                                 | 15  | <b>CS</b>                                                                                    | 305.66 $\pm$ 15.387 (ns)                                                | 26.667 $\pm$ 1.120 (ns)                                                 | 4.142 $\pm$ 0.592 (*)                                                 | 0.1505 $\pm$ 0.02657 (ns)                               |

**Table S1**

|                                                           |                                                                                                                                                                                      |    |                             |                        |                       |                      |                          |
|-----------------------------------------------------------|--------------------------------------------------------------------------------------------------------------------------------------------------------------------------------------|----|-----------------------------|------------------------|-----------------------|----------------------|--------------------------|
| <b>UAS-rGluK2 (neuron)</b>                                | <i>OK319-Gal4/+; +UAS-rGluK2</i>                                                                                                                                                     | 16 | <b>CS</b>                   | 308.34±13.395<br>(ns)  | 24.125±0.645<br>(ns)  | 2.231±0.441<br>(ns)  | 0.07540±0.01777<br>(ns)  |
| <b>vglut<sup>Hypo</sup> + UAS-PLTXII</b>                  | <i>vglut<sup>1</sup><sub>OK319-Gal4/vglut<sup>ΔK371ΔD</sup></sub>; +UAS-PLTXII</i>                                                                                                   | 26 | <b>vglut<sup>Dff+</sup></b> | 298.85±7.872<br>(***)  | 25.308±0.658<br>(***) | 6.731±0.890<br>(*)   | 0.2825±0.04470<br>(***)  |
| <b>vglut<sup>Hypo</sup> + UAS-<math>\delta</math>ACTX</b> | <i>vglut<sup>1</sup><sub>OK319-Gal4/vglut<sup>ΔK371ΔD</sup></sub>; +UAS-<math>\delta</math>ACTX</i>                                                                                  | 25 | <b>vglut<sup>Dff+</sup></b> | 288.72±13.379<br>(**)  | 25.520±1.022<br>(***) | 6.760±0.710<br>(**)  | 0.2705±0.03107<br>(***)  |
| <b>Control(cpx) cpx<sup>Dff+</sup></b>                    | <i>Df(3R)ED5021/+</i>                                                                                                                                                                | 35 | <b>N/A</b>                  | 282.98±6.927           | 25.694±0.720          | 3.556±0.426          | 0.1407±0.0163            |
| <b>cpx<sup>-/-</sup></b>                                  | <i>Df(3R)ED5021/cpx<sup>SH1</sup></i>                                                                                                                                                | 38 | <b>cpx<sup>Dff+</sup></b>   | 407.96±11.755<br>(***) | 33.795±1.068<br>(**)  | 1.897±0.276<br>(**)  | 0.0598±0.00902<br>(***)  |
| <b>cpx<sup>-/-</sup> + UAS-Cpx</b>                        | <i>UAS-Cpx/+; OK6-Gal4/+; Df(3R)ED5021/cpx<sup>SH1</sup></i>                                                                                                                         | 46 | <b>cpx<sup>Dff+</sup></b>   | 312.79±8.318<br>(ns)   | 28.067±0.853<br>(ns)  | 4.933±0.433<br>(*)   | 0.1863±0.0172<br>(ns)    |
| <b>Cpx<sup>1257/-</sup></b>                               | <i>Df(3R)ED5021/cpx<sup>1257</sup></i>                                                                                                                                               | 23 | <b>cpx<sup>Dff+</sup></b>   | 432.33±26.326<br>(***) | 33.65±0.8331<br>(***) | 3.182±0.439<br>(ns)  | 0.08891±0.0136<br>(*)    |
| <b>cpx<sup>-/-</sup> + UAS-PLTXII</b>                     | <i>OK6-Gal4/UAS-PLTXII; Df(3R)ED5021/cpx<sup>SH1</sup></i>                                                                                                                           | 24 | <b>cpx<sup>Dff+</sup></b>   | 391.62±10.172<br>(***) | 35.50±1.234<br>(***)  | 1.292±0.321<br>(***) | 0.03705±0.00896<br>(***) |
| <b>cpx<sup>-/-</sup> + UAS-dGluR<sup>DN</sup></b>         | <i>G14-Gal4/UAS-dglurIIA<sup>E783A</sup>; Df(3R)ED5021/cpx<sup>SH1</sup></i>                                                                                                         | 41 | <b>cpx<sup>Dff+</sup></b>   | 262.65±10.146<br>(ns)  | 25.105±0.951<br>(ns)  | 3.447±0.507<br>(ns)  | 0.1518±0.0289<br>(ns)    |
| <b>cpx<sup>-/-</sup> + Vglut-RNAi</b>                     | <i>OK6-Gal4/ UAS-Vglut-RNAi<sup>VDR104324</sup>; Df(3R)ED5021/cpx<sup>SH1</sup></i>                                                                                                  | 56 | <b>cpx<sup>Dff+</sup></b>   | 333.78±7.394<br>(**)   | 28.585±0.839<br>(ns)  | 5.018±0.455<br>(*)   | 0.1881±0.0193<br>(*)     |
| <b>UAS-dGluR<sup>DN</sup></b>                             | <i>G14-Gal4/UAS-dglurIIA<sup>E783A</sup></i>                                                                                                                                         | 29 | <b>CS</b>                   | 279.49±10.734<br>(ns)  | 25.964±0.864<br>(ns)  | 2.071±0.329<br>(*)   | 0.08391±0.0138<br>(*)    |
| <b>Vglut-RNAi</b>                                         | <i>OK6-Gal4/ UAS-Vglut-RNAi<sup>VDR104324</sup></i>                                                                                                                                  | 28 | <b>CS</b>                   | 275.59±9.57<br>(ns)    | 26.034±1.318<br>(ns)  | 5.241±0.683<br>(***) | 0.2152±0.0327<br>(***)   |
| <b>trio<sup>-/-</sup></b>                                 | <i>trio<sup>S137203</sup>/trio<sup>S137203</sup></i>                                                                                                                                 | 30 | <b>CS</b>                   | 192.81±8.794<br>(***)  | 17.194±0.905<br>(***) | 5.700±0.526<br>(***) | 0.3549±0.4404<br>(***)   |
| <b>Trio<sup>-/-</sup> + UAS-Trio</b>                      | <i>UAS-Trio/+; +OK319-Gal4; trio<sup>S137203</sup>/trio<sup>S137203</sup></i>                                                                                                        | 23 | <b>CS</b>                   | 291.98±12.734<br>(ns)  | 23.608±0.963<br>(ns)  | 2.545±0.3821<br>(ns) | 0.09846±0.01471<br>(ns)  |
| <b>trio<sup>-/-</sup>; cpx<sup>-/-</sup></b>              | <i>trio<sup>S137203</sup>/trio<sup>S137203</sup>; cpx<sup>SH1</sup>/cpx<sup>SH1</sup></i>                                                                                            | 28 | <b>cpx<sup>Dff+</sup></b>   | 204.62±8.34<br>(***)   | 19.467±0.716<br>(***) | 7.267±0.959<br>(**)  | 0.3893±0.0524<br>(***)   |
| <b>iGluR<sup>MUT</sup> + UAS-Trio</b>                     | <i>dglurIIA, IIB<sup>SP22</sup>, OK319-Gal4/ Df(2L)cl<sup>h4</sup>, genomic-dglurIIA<math>\Delta</math>3UTR; genomic-dglurIIA<sup>E783A</sup>/UAS-Trio</i>                           | 30 | <b>iGluR<sup>WT</sup></b>   | 305.37±14.7<br>(ns)    | 28.74±1.07<br>(ns)    | 5.345±0.659<br>(***) | 0.1842±0.0253<br>(***)   |
| <b>iGluR<sup>MUT</sup> + UAS-Rac1<sup>WT</sup></b>        | <i>dglurIIA, IIB<sup>SP22</sup>, OK319-Gal4/ Df(2L)cl<sup>h4</sup>, genomic-dglurIIA<math>\Delta</math>3UTR; genomic-dglurIIA<sup>E783A</sup>/UAS-Rac1</i>                           | 23 | <b>iGluR<sup>WT</sup></b>   | 256.03±16.41<br>(**)   | 22.09±1.17<br>(***)   | 5.909±0.916<br>(***) | 0.3478±0.0620<br>(***)   |
| <b>iGluR<sup>MUT</sup> + UAS-Rac1<sup>Act</sup></b>       | <i>dglurIIA, IIB<sup>SP22</sup>, OK319-Gal4/ Df(2L)cl<sup>h4</sup>, genomic-dglurIIA<math>\Delta</math>3UTR; genomic-dglurIIA<sup>E783A</sup>/UAS-Rac1<sup>V12</sup></i>             | 23 | <b>iGluR<sup>WT</sup></b>   | 306.46±19.93<br>(ns)   | 30.2±0.846<br>(ns)    | 5.077±0.604<br>(***) | 0.1482±0.0226<br>(**)    |
| <b>iGluR<sup>WT</sup> + trio<sup>-/-</sup></b>            | <i>dglurIIA, IIB<sup>SP22</sup>, Df(2L)cl<sup>h4</sup>, genomic-dglurIIA<math>\Delta</math>3UTR; trio<sup>S137203</sup>, genomic-dglurIIA/trio<sup>S137203</sup></i>                 | 35 | <b>iGluR<sup>WT</sup></b>   | 180.53±7.62<br>(***)   | 11.861±0.524<br>(***) | 4.297±0.525<br>(***) | 0.4459±0.0814<br>(***)   |
| <b>iGluR<sup>MUT</sup> + trio<sup>-/-</sup></b>           | <i>dglurIIA, IIB<sup>SP22</sup>, Df(2L)cl<sup>h4</sup>, genomic-dglurIIA<math>\Delta</math>3UTR; trio<sup>S137203</sup>, genomic-dglurIIA<sup>E783A</sup>/trio<sup>S137203</sup></i> | 24 | <b>iGluR<sup>WT</sup></b>   | 188.25±7.93<br>(***)   | 13.125±0.588<br>(***) | 6.960±0.488<br>(***) | 0.5243±0.0343<br>(***)   |
| <b>iGluR<sup>WT</sup> + UAS-Trio</b>                      | <i>dglurIIA, IIB<sup>SP22</sup>, OK319-Gal4/ Df(2L)cl<sup>h4</sup>, genomic-dglurIIA<math>\Delta</math>3UTR; genomic-dglurIIA<sup>WT</sup>/UAS-Trio</i>                              | 26 | <b>iGluR<sup>WT</sup></b>   | 347.17±8.94<br>(*)     | 33.96±0.774<br>(**)   | 3.038±0.316<br>(ns)  | 0.089±0.01046<br>(ns)    |
| <b>iGluR<sup>WT</sup> + UAS-Rac1<sup>WT</sup></b>         | <i>dglurIIA, IIB<sup>SP22</sup>, OK319-Gal4/ Df(2L)cl<sup>h4</sup>, genomic-dglurIIA<math>\Delta</math>3UTR; genomic-dglurIIA<sup>WT</sup>/UAS-Rac1<sup>WT</sup></i>                 | 32 | <b>iGluR<sup>WT</sup></b>   | 380.60±14.53<br>(***)  | 35.43±1.04<br>(***)   | 8.100±0.894<br>(***) | 0.2301±0.02714<br>(***)  |
| <b>iGluR<sup>WT</sup> + UAS-Rac1<sup>Act</sup></b>        | <i>dglurIIA, IIB<sup>SP22</sup>, OK319-Gal4/ Df(2L)cl<sup>h4</sup>, genomic-dglurIIA<math>\Delta</math>3UTR; genomic-dglurIIA<sup>WT</sup>/UAS-Rac1<sup>V12</sup></i>                | 22 | <b>iGluR<sup>WT</sup></b>   | 316.51±12.74<br>(ns)   | 31.08±1.16<br>(ns)    | 4.208±0.430<br>(***) | 0.1355±0.01251<br>(***)  |

**Table S1  
(Continued)**

**A** Amplitude of eEPSPs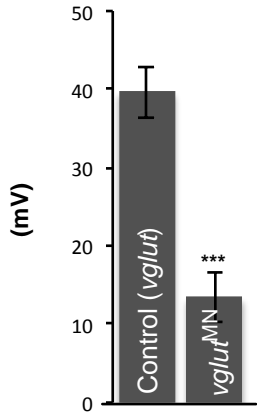**B** Frequency of mEPSPs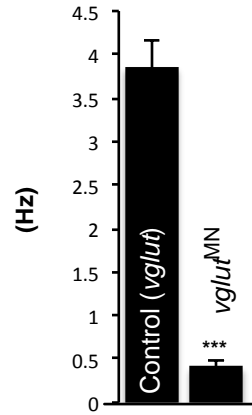**C** Amplitude of mEPSPs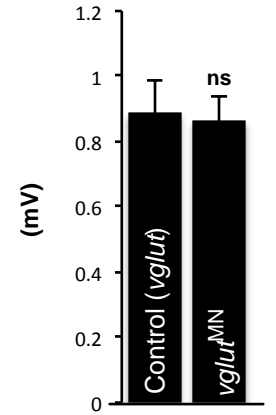**D** Small Bouton (< 2 μm<sup>2</sup>) Typical Bouton (> 2 μm<sup>2</sup>)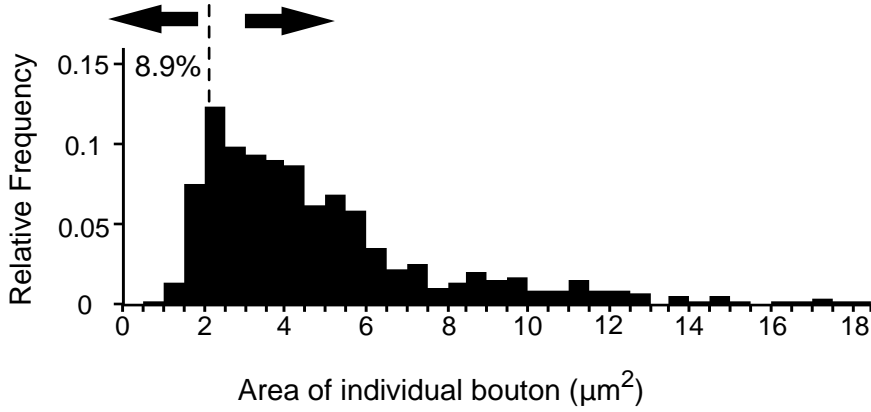**Figure S1****E** Synaptic terminal area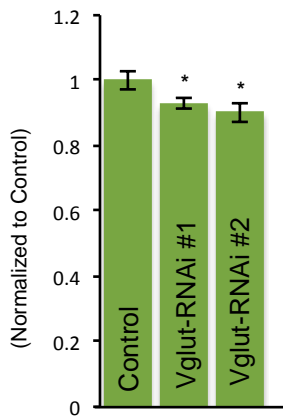**F** Bouton size index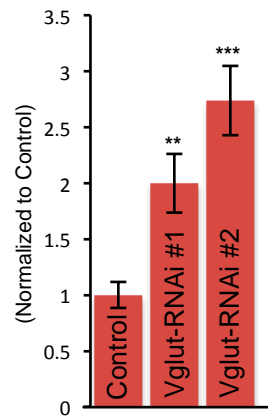**G** Synaptic terminal area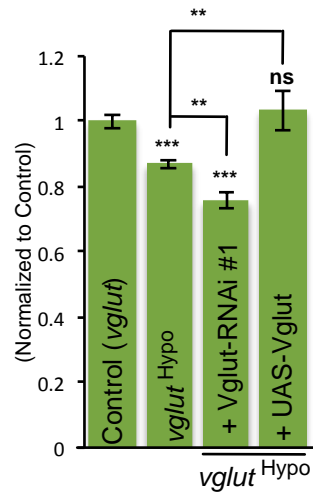**H** Bouton size index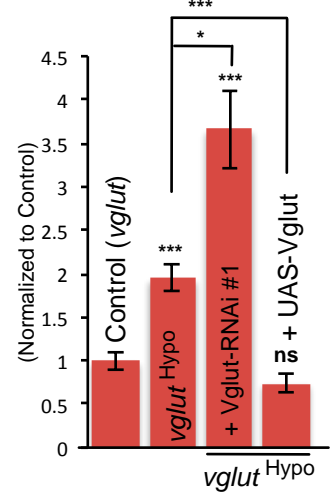

$$vglut^{MN} = vglut^{Hypo} + Vglut-RNAi \#1$$

**Figure S1. Electrophysiological and morphological quantification of *vglut* mutants and bouton size distribution of wild type terminals, Related to Figure 1.**

**A-C**, Quantification of (A) the amplitude of eEPSPs ( $n \geq 6$ ), (B) the frequency of mEPSPs and (C) the amplitude of mEPSPs ( $n \geq 9$ ). **D**, Relative frequency histogram for the distribution of individual bouton sizes of wild type (CS) boutons in  $0.5 \mu\text{m}^2$  increments. ( $n=603$  boutons from  $n=16$  NMJs)

**E-H**, Quantification of the NMJ (E,G) synaptic terminal area and (F,H) bouton size index ( $n \geq 24$ ) of the **Control** [CS], **Vglut1-RNAi#1** [ $+/UAS-Vglut-RNAi^{KK};D42-Gal4/UAS-Vglut-RNAi^{JF}$ ], **Vglut1-RNAi#2** [ $OK6-Gal4/+;D42-Gal4/UAS-Vglut-RNAi^{HMS}$ ], **Control(*vglut*)** [ $vglut^{Df/+}$ ], ***vglut*<sup>Hypo</sup>** [ $vglut^{Hypo/Df}$ ], ***vglut*<sup>Hypo</sup> + Vglut-RNAi#1** [ $vglut^{MN} = vglut^{Hypo/Df}, UAS-Vglut-RNAi^{KK};D42-Gal4/UAS-Vglut-RNAi^{JF}$ ] and ***vglut*<sup>Hypo</sup> + UAS-Vglut** [ $vglut^{Hypo/Df}, OK319-Gal4;+/UAS-Vglut$ ] normalized to controls [CS for E,F and  $vglut^{Df/+}$  for G,H] Error bars indicate  $\pm$  s.e.m. \*= $p < 0.05$ , \*\*=  $p < 0.01$ , \*\*\*= $p < 0.001$ .

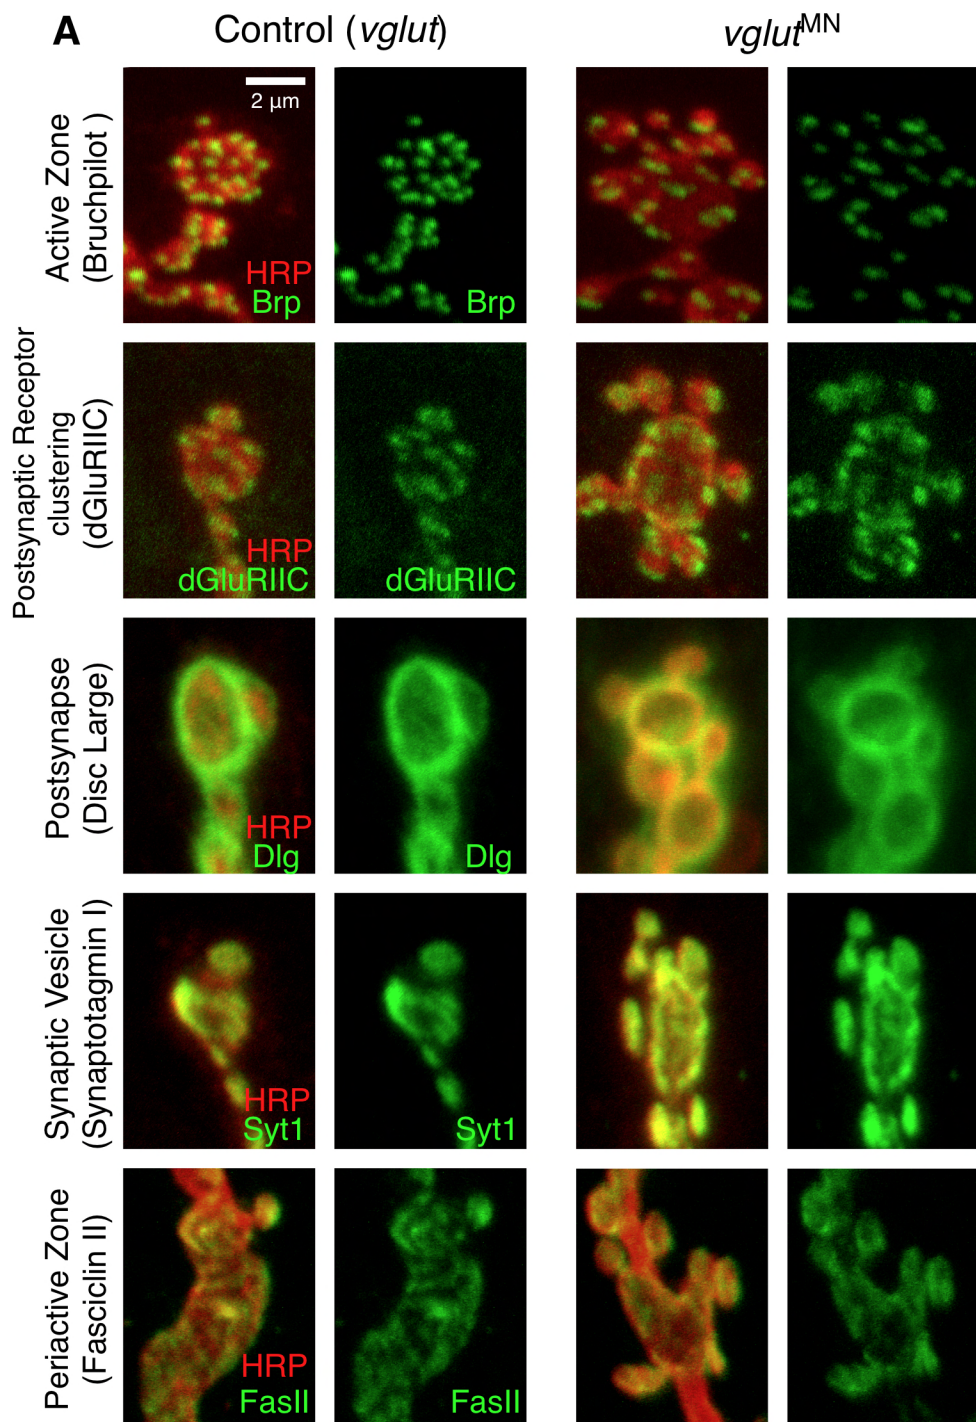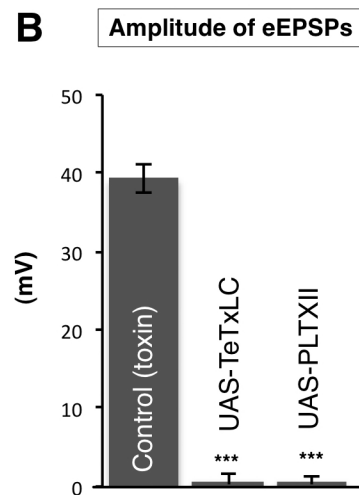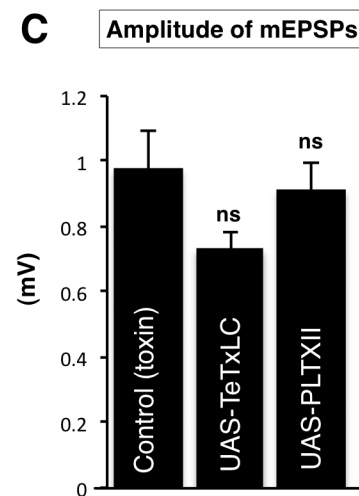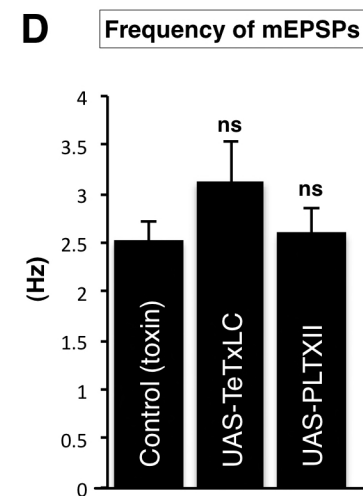

**Figure S2**

**Figure S2. Synaptic markers at small boutons of *vglut* mutants and electrophysiological quantification of toxin mutants, Related to Figure 1.**

**A**, Representative boutons from control(*vglut*) [*vglut*<sup>Df/+</sup>] and *vglut*<sup>MN</sup> at muscle 4 labeled with indicated synaptic markers (green) and the neuronal membrane marker HRP (red). Scale is the same for all images. **B-D**, Quantification of (B) the amplitude of eEPSPs (n≥6), (C) the amplitude of mEPSPs and (D) the frequency of mEPSPs (n≥9). All error bars indicate ± s.e.m. \* =p<0.05, \*\*\*=p< 0.001.

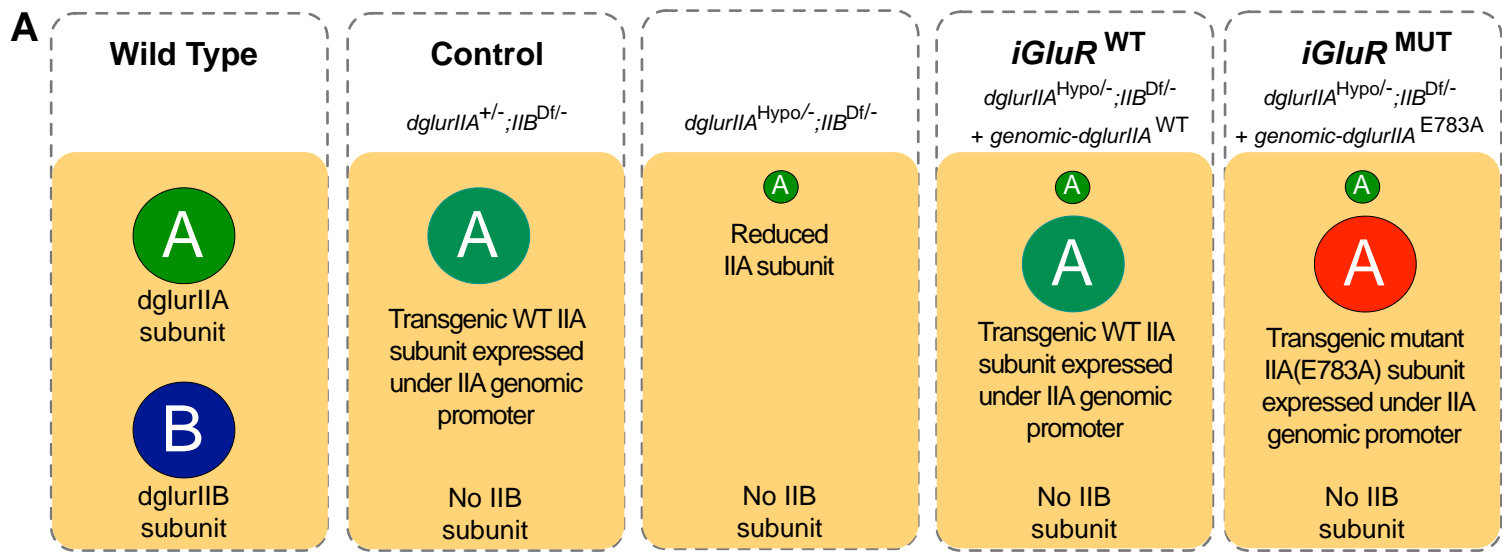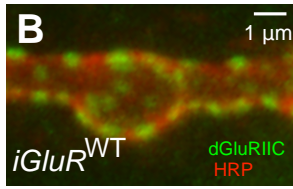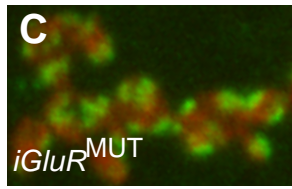

**D** Synaptic dGluRIIC intensity

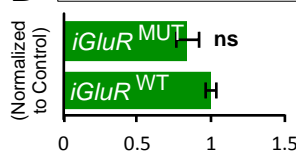

**Figure S3**

**E** Amplitude of eEPSPs

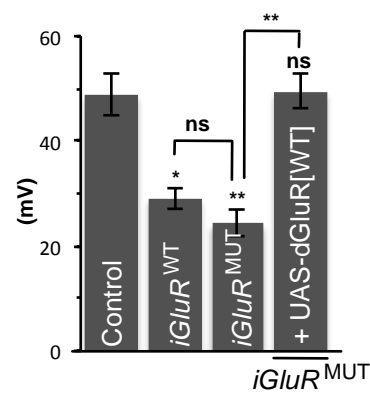

**F** Amplitude of mEPSPs

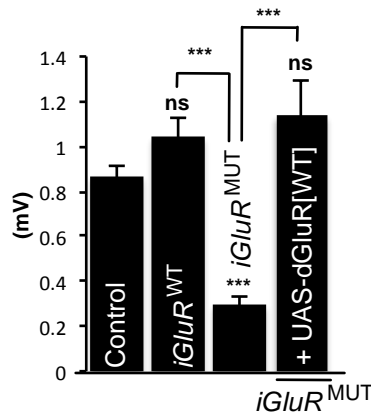

**G** Frequency of mEPSPs

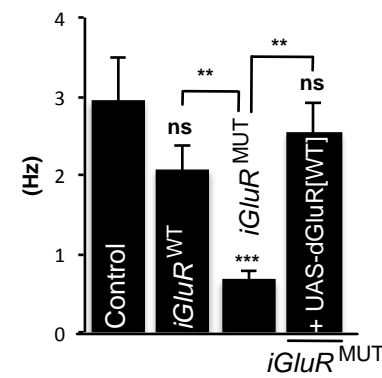

**H** Quantal Content

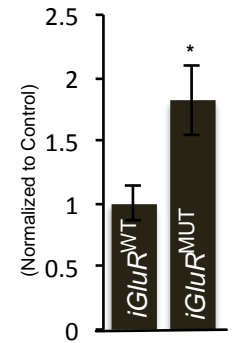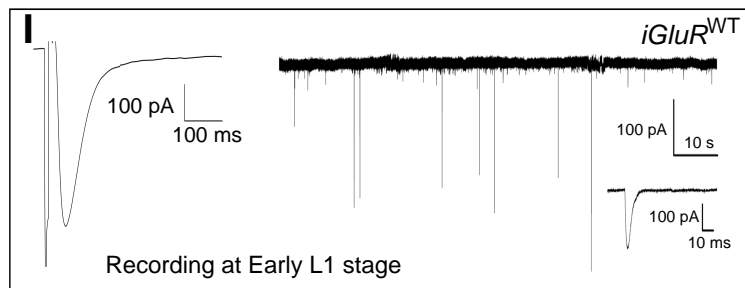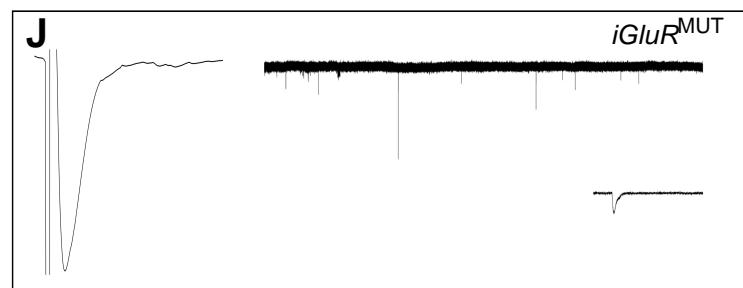

**K** Amplitude of eEPSCs

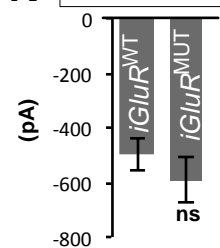

**L** Amplitude of mEPSCs

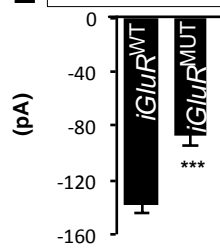

**M** Frequency of mEPSCs

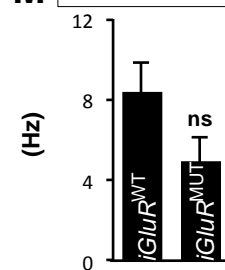

**N** Quantal content

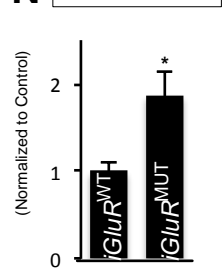



**Figure S3. iGluR mutant genotypes, abbreviations, synaptic receptor levels, quantification of electrophysiology, Related to Figure 2.**

**A**, Schematic of abbreviations, genotype, subunit composition and description of iGluR mutants in Figure 2. **B,C**, Representative terminals from (B) *iGluR<sup>WT</sup>* and (C) *iGluR<sup>MUT</sup>*, labeled with the iGluR subunit, dGluRIIC (green) and the neuronal membrane marker HRP (red). dGluRIIC is an obligatory co-subunit required for functional channels with dGluRIIA. iGluR synaptic clustering is similar in *iGluR<sup>WT</sup>* and *iGluR<sup>MUT</sup>*. **D**, Quantification of the ratio of synaptic dGluRIIC intensity to HRP normalized to control ( $n \geq 10$ ). **E-H**, Quantification of (E) the amplitude of eEPSPs, (F) the amplitude of mEPSPs, (G) the frequency of mEPSPs and (H) normalized quantal content (eEPSP amplitude / mEPSP amplitude after correction for nonlinear summation errors) to control ( $n \geq 8$ ) of the indicated genotypes. **I,J**, Representative traces of excitatory post-synaptic current (eEPSC) (left) and miniature excitatory post-synaptic currents (mEPSCs) (right) recorded from early first instar larvae from *iGluR<sup>WT</sup>* and *iGluR<sup>MUT</sup>*. **K-N**, Quantification of (K) the amplitude of eEPSCs, (L) the amplitude of mEPSCs, (M) the frequency of mEPSCs and (N) normalized quantal contents (eEPSC amplitude / mEPSC amplitude) to control ( $n \geq 5$ ) of *iGluR<sup>WT</sup>* and *iGluR<sup>MUT</sup>*. Scale is the same between images B,C and between I,J. All error bars indicate  $\pm$  s.e.m. \* =  $p < 0.05$ , \*\*\*  $< 0.001$ .

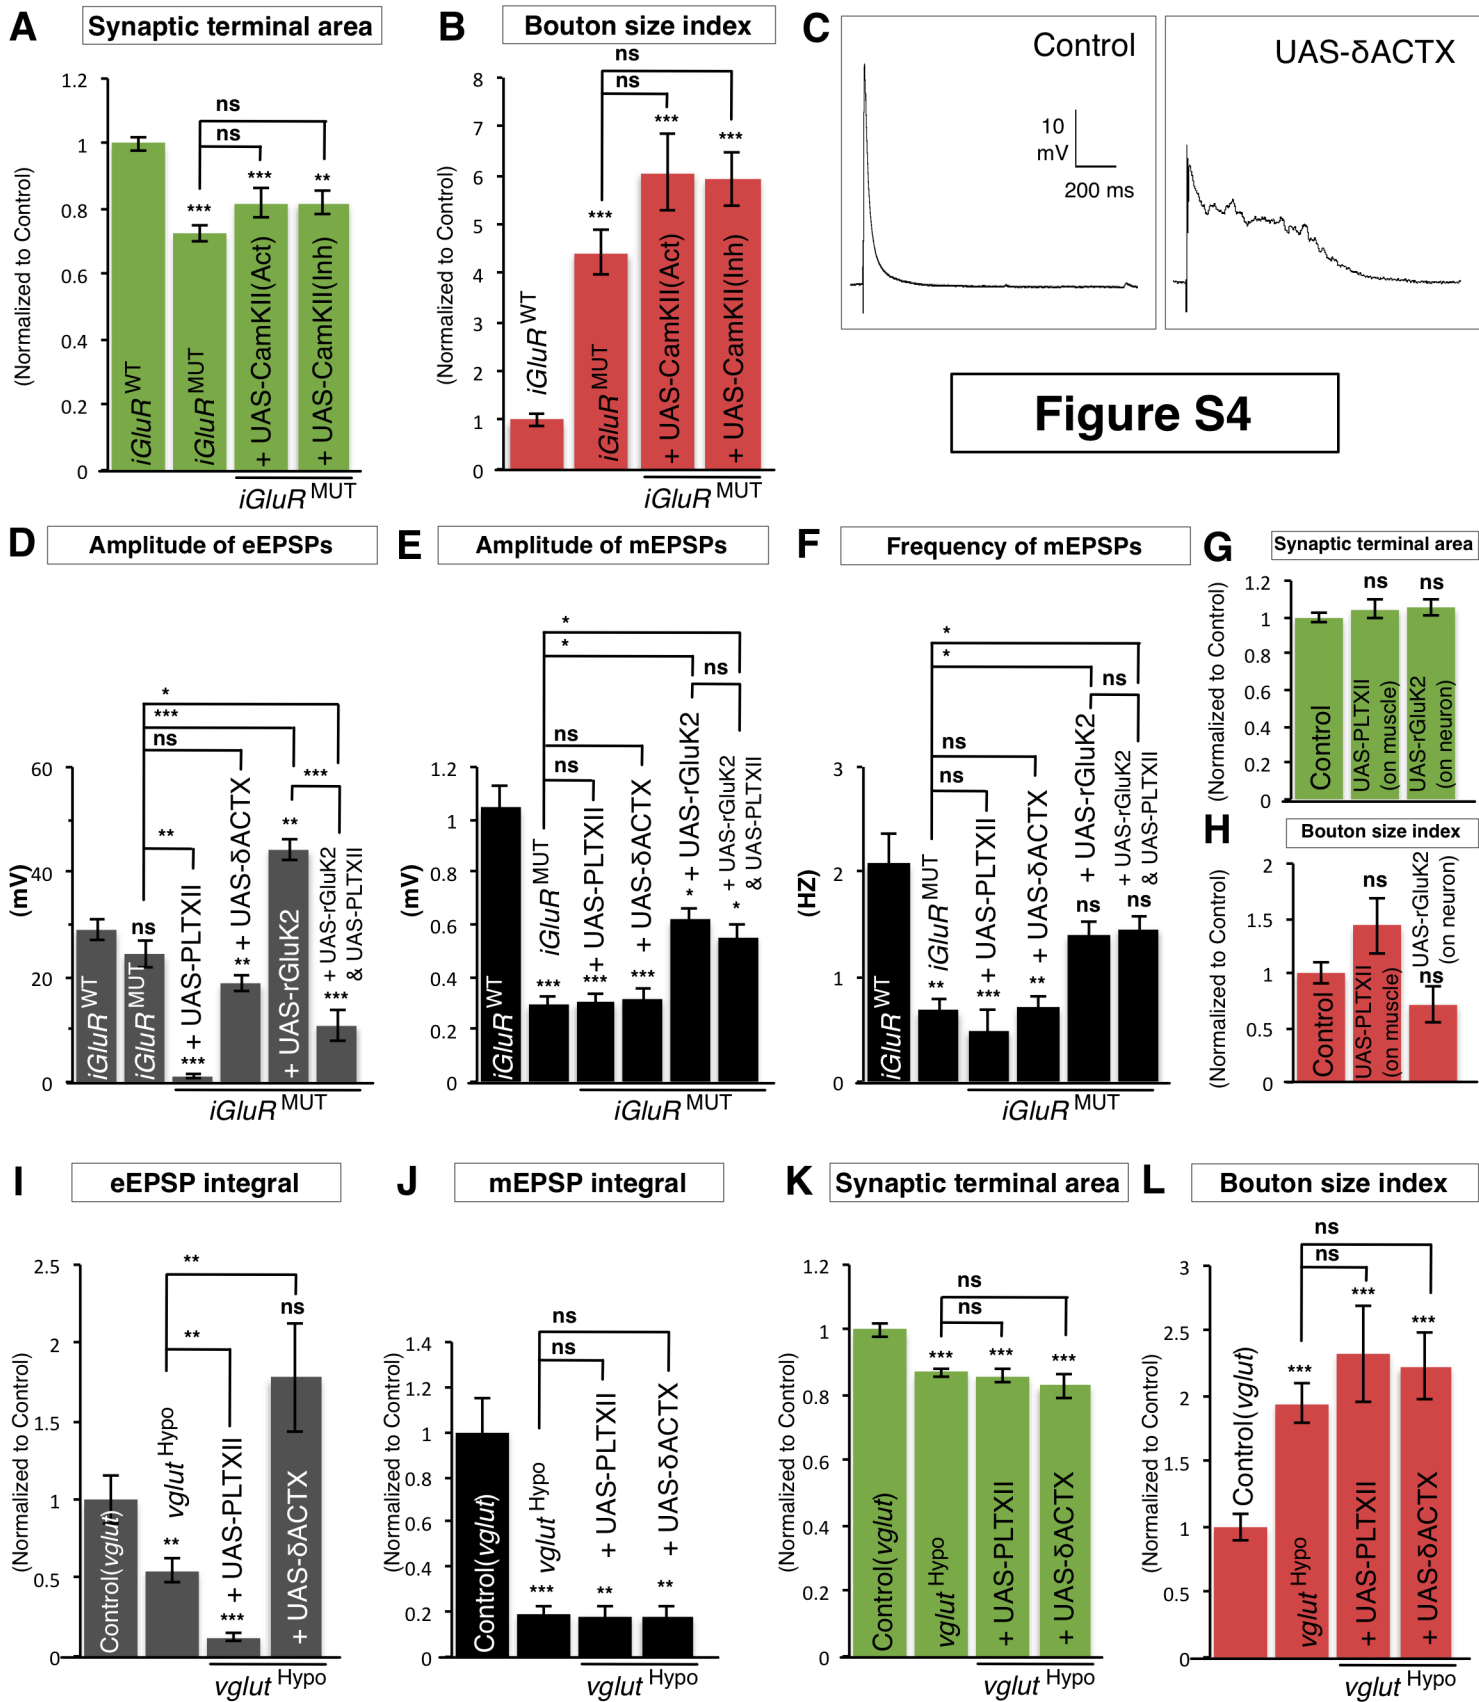

**Figure S4**

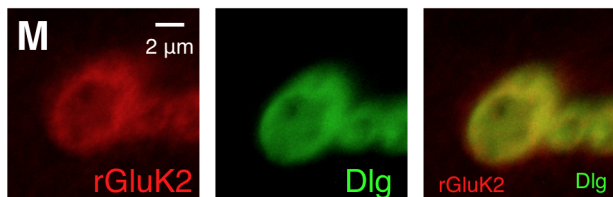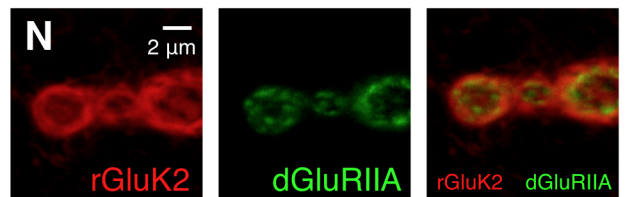

**Figure S4. Electrophysiological and morphological quantification and synaptic receptor localization, Related to Figure 2 and Figure 3.**

**A,B,D-L**, Quantification of the NMJ (A,G,K) synaptic terminal area, (B,H,L) bouton size index ( $n \geq 17$  for A,B,  $n \geq 15$  for G,H and  $n \geq 25$  for K,L), (D) the amplitude of eEPSPs, (E) the amplitude of mEPSPs, (F) the frequency of mEPSPs ( $n \geq 8$ ), (I) eEPSP integral and (J) mEPSP integral ( $n \geq 5$ ) of the indicated genotypes normalized to controls [*iGluR*<sup>WT</sup> for A,B,D-F, *vglut*<sup>Df/+</sup> for I-L and CS for G,H]. Detailed description of used genotypes are as follows, ***iGluR*<sup>MUT</sup>+UAS-CamKII<sup>Act</sup>** [*dglurIIA*<sup>Hypo/-</sup>,*IIB*<sup>Df/-</sup>,*G14-Gal4;UAS-CamKII*<sup>T287D</sup>/*genomic-dglurIIA*<sup>E783A</sup>], ***iGluR*<sup>MUT</sup>+UAS-CamKII<sup>Inh</sup>** [*dglurIIA*<sup>Hypo/-</sup>,*IIB*<sup>Df/-</sup>,*G14-Gal4;UAS-CamKII*<sup>Ntide</sup>/*genomic-dglurIIA*<sup>E783A</sup>], **Control(*vglut*)** [*vglut*<sup>Df/+</sup>], ***vglut*<sup>Hypo</sup>**[*vglut*<sup>Hypo/Df</sup>], ***vglut*<sup>Hypo</sup> + UAS-PLTXII** [*vglut*<sup>Hypo/Df</sup>,*OK319-Gal4*;*+/UAS-PLTXII*], ***vglut*<sup>Hypo</sup> + UAS- $\delta$ ACTX** [*vglut*<sup>Hypo/Df</sup>,*OK319-Gal4*;*+/UAS- $\delta$ ACTX*], **Control** [CS], **UAS-PLTXII (on muscle)** [*G14-Gal4*/*+/+/UAS-PLTXII*] and **UAS-rGluK2 (on neuron)** [*OK319-Gal4*/*+/+/UAS-rGluK2*]. **C**, Representative trace of **Control** [CS] and **UAS- $\delta$ ACTX** [*OK319-Gal4*/*+/+/UAS- $\delta$ ACTX*] **M,N**, Representative terminals from UAS-rGluK2 [*UAS-rGluK2/C57-Gal4*], labeled with the rGluK2 (red), Dlg (green for M) or dGluRIIA (green for N). Error bars indicate  $\pm$  s.e.m. \*= $p < 0.05$ , \*\*= $p < 0.01$ , \*\*\*= $p < 0.001$ .

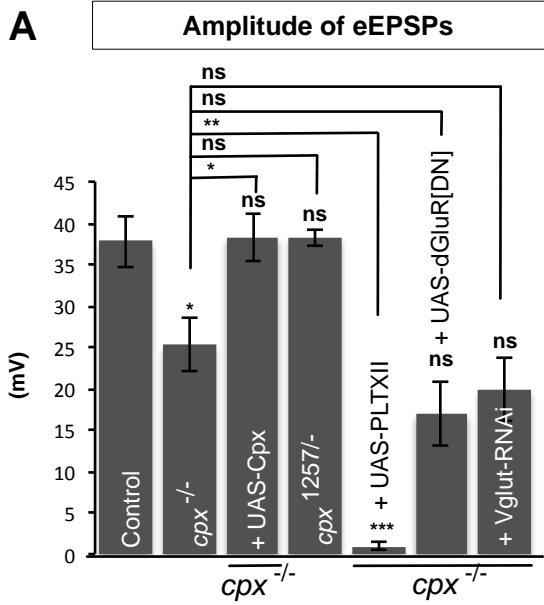

Figure S5

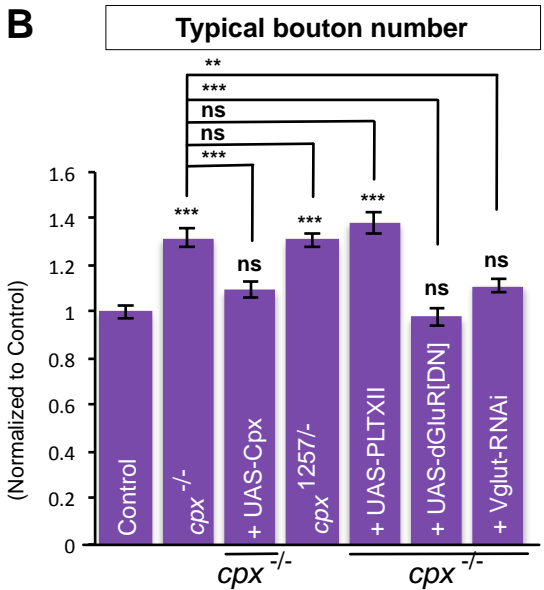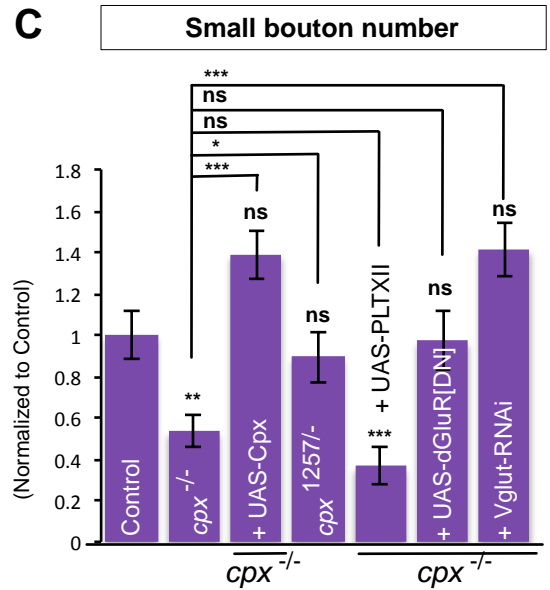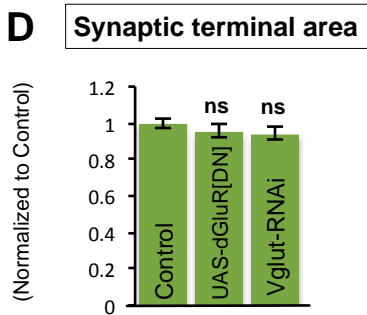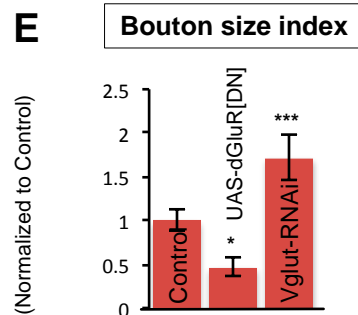

**Figure S5. Electrophysiological and morphological quantification of *cpx* mutants, Related to Figure 4.**

**A-D**, Quantification of NMJ (A) the amplitude of eEPSPs ( $n \geq 8$ ), (B) typical bouton number, (C) small bouton number ( $n \geq 35$ ), (D) synaptic terminal area and (E) bouton size index ( $n \geq 28$ ) of the indicated genotypes normalized to controls [*cpx*<sup>Di/+</sup> for B,C and CS for D,E]. Detailed description of used genotypes are followed, **UAS-dGluR<sup>DN</sup>** [*G14-Gal4/+;+/UAS-dglurIIA<sup>E783A</sup>*] and **Vglut-RNAi** [*OK6-Gal4/UAS-Vglut-RNAi<sup>KK</sup>*]. All error bars indicate  $\pm$  s.e.m. \* = $p < 0.05$ , \*\* =  $p < 0.01$ , \*\*\*= $p < 0.001$ .

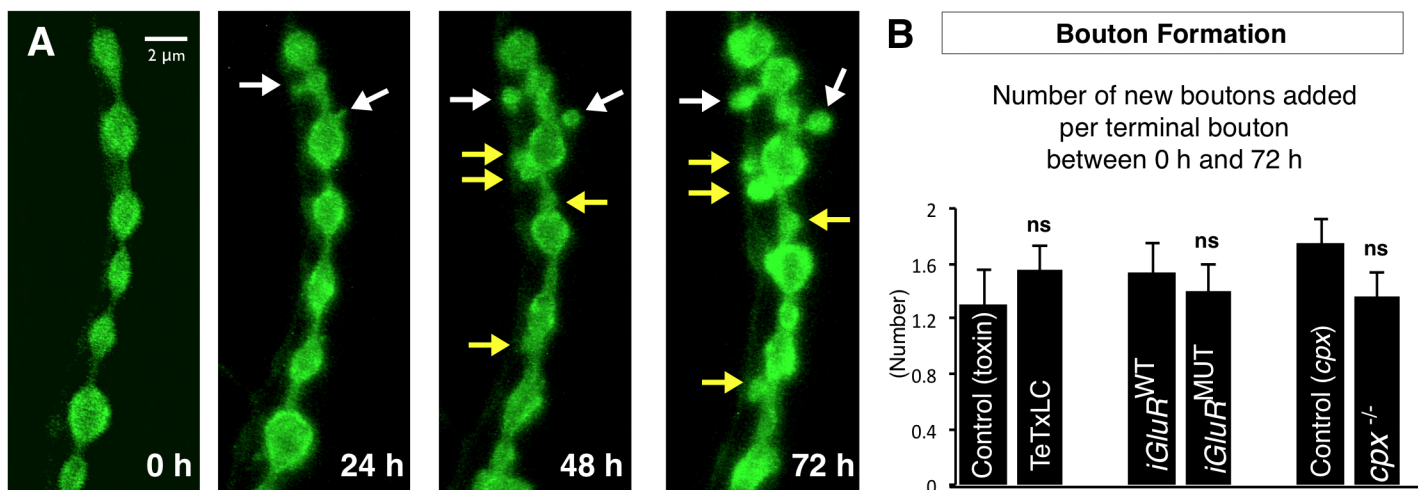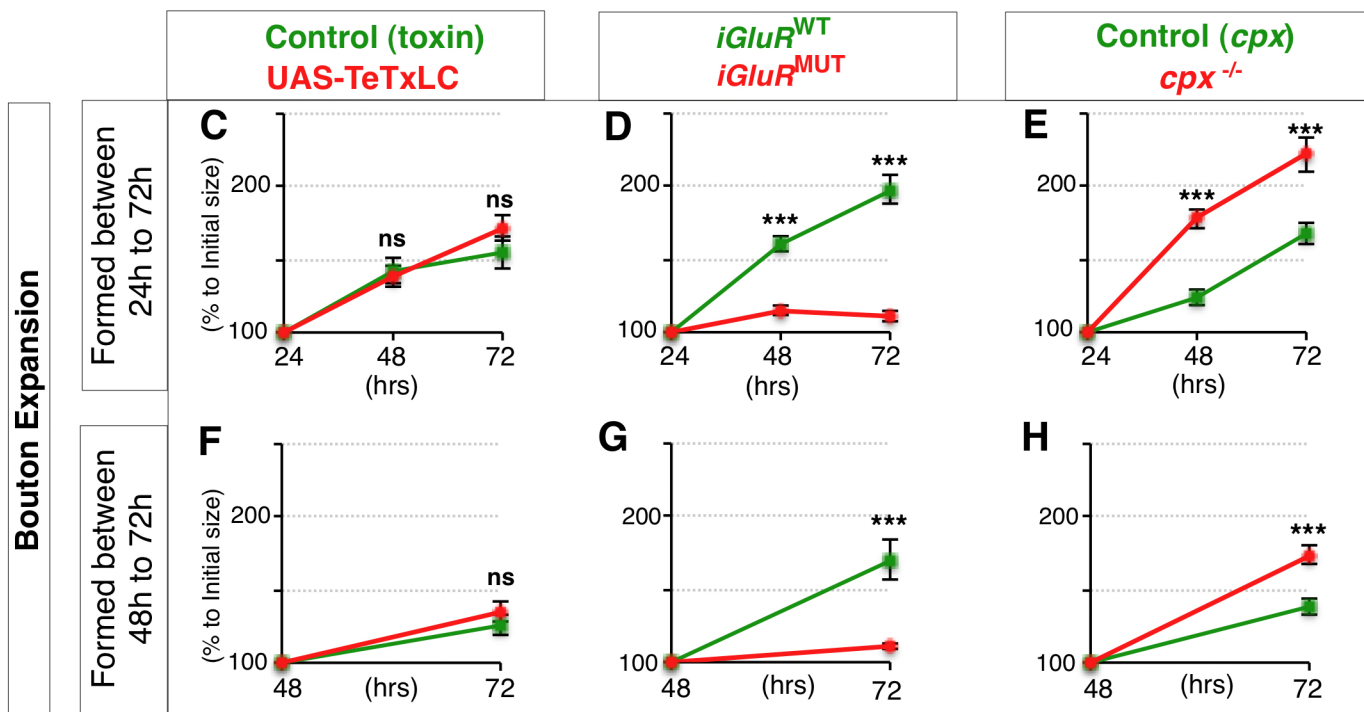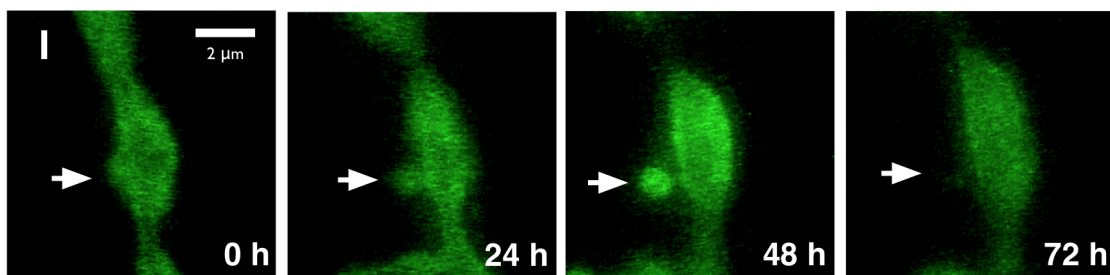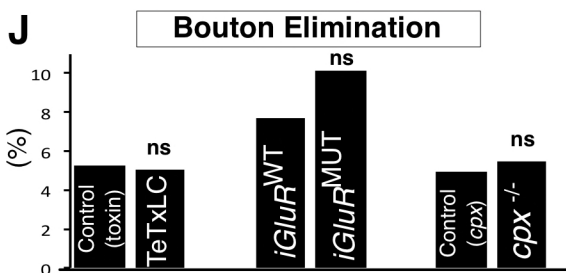

**Figure S6**

**Figure S6. Time-lapse images and measurement of bouton formation, expansion and elimination, Related to Figure 5.**

**A**, Representative time-lapse images of synaptic boutons from control [*Vglut-lexA, LexOp-CD8-GFP/+*] at muscles 1/9 labeled with membrane tagged GFP expressed in all MNs. Arrows indicate new immature boutons formed between 0h-24h (white) or 24h-48h (yellow). **B**, Quantification of the number of new boutons added from terminal boutons ( $n \geq 26$  terminal boutons from  $n \geq 7$  NMJs) for indicated genotypes. **C-H**, Quantification of the bouton size expansion during time-lapse imaging period ( $n \geq 41$  boutons from  $n \geq 7$  NMJs for C-E,  $n \geq 18$  boutons from  $n \geq 7$  NMJs for F-H) for indicated genotypes. Imaging period is from 24h to 72h for C-E and from 48h to 72h for F-H. All data are normalized to initial bouton size. **I**, Representative time-lapse synaptic boutons of control [*Vglut-lexA, LexOp-CD8-GFP/+*] at muscle 1/9 labeled with membrane tagged GFP expressed at all MNs. Arrows indicate an eliminated bouton. **J**, Quantification of the percentage of bouton elimination for indicated genotypes ( $n \geq 113$  of all boutons from  $n \geq 7$  NMJs). Elimination was scored as the disappearance of bouton between imaging periods. These events are likely not analogous to synaptic 'retractions' as among 113 boutons imaged in control animals we confirmed only a single synaptic 'foot-print' (Dlg staining without presynaptic HRP marker). Scale is the same for images in A and I. For (J), p value was calculated by Fisher's exact test between mutant and control. All error bars indicate  $\pm$  s.e.m. \* =  $p < 0.05$ , \*\*\* =  $p < 0.001$ .

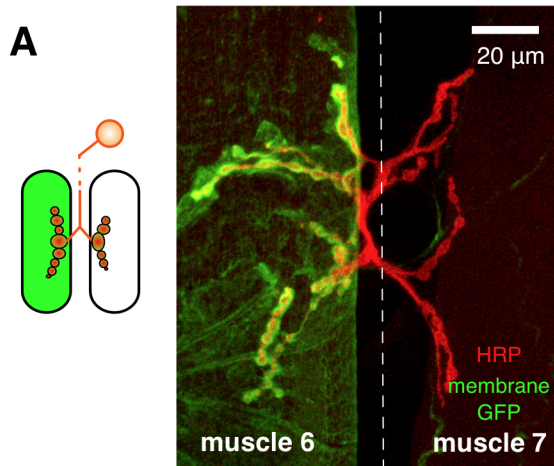

UAS membrane tag GFP expressed by muscle 6 specific Gal4 driver

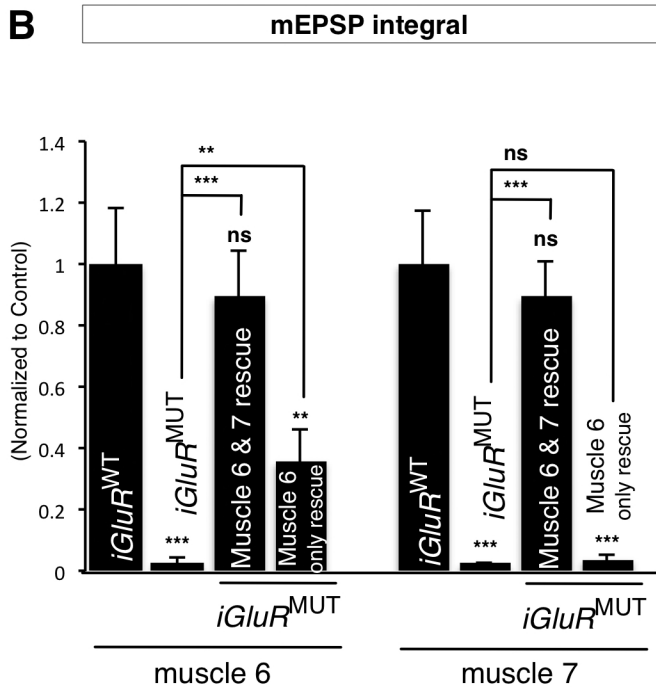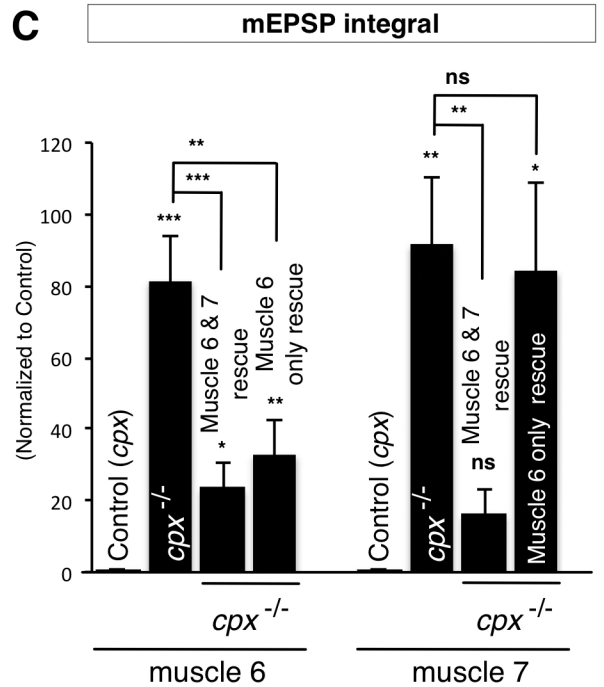

**Figure S7**



**Figure S7. Representative Muscle 6 specific Gal4 image and electrophysiological quantification, Related to Figure 7.**

**A**, Representative RP3 terminals at muscle 6 and muscle 7, segment A3 from late third instar larvae stage animals labeled with membrane tagged GFP (Green) and neuronal membrane marker HRP (red). UAS-CD8-GFP was expressed with the muscle 6 specific Gal4 driver combination H94-Gal4,nSyb-Gal80 combined with  $tub^P>stop>Gal4$ , UAS-FLP. The  $tub^P>stop>Gal4$  construct was used to demonstrate that the H94-Gal4,nSyb-Gal80 combination does not produce Gal4 in muscle 7 throughout experimental period. **B,C**, Quantification of the mEPSP integral for indicated genotypes ( $n \geq 8$  for B,  $n \geq 5$  for C).

**A Typical bouton number**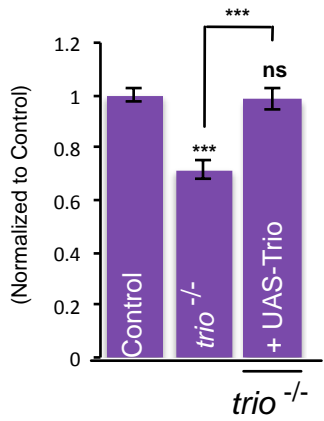**B Small bouton number**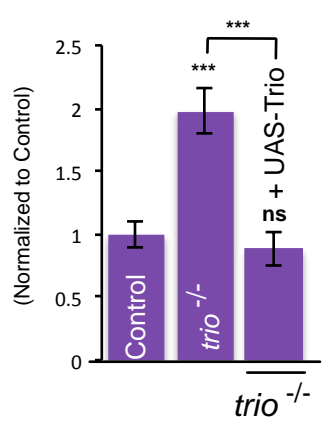**Figure S8****C T-bar Platform size**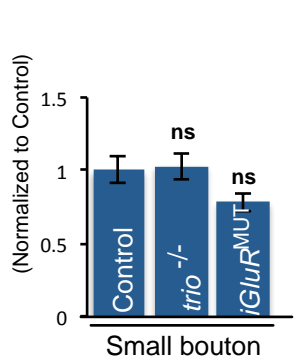**D T-bar Pedestal size**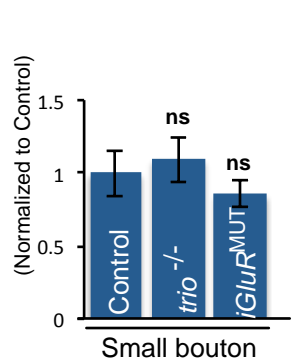**E mEPSP integral**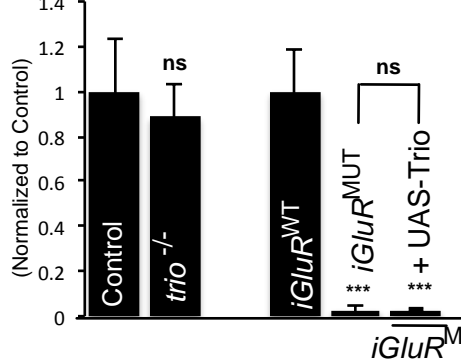**F mEPSP integral**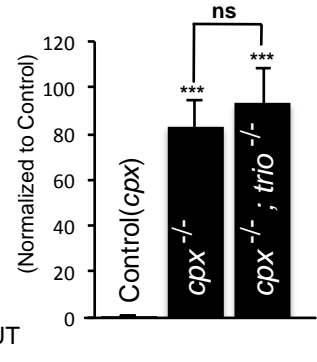**G Synaptic terminal area**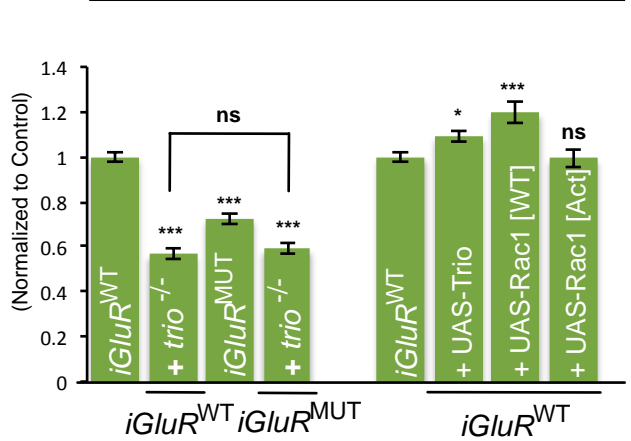**H Bouton size index**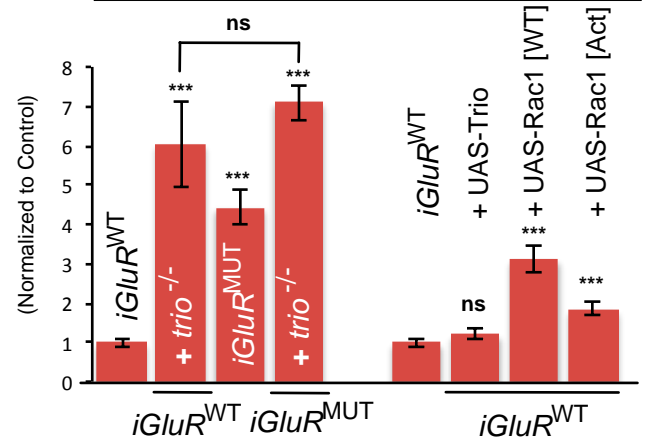

**Figure S8. Electrophysiological and morphological quantification, Related to Figure 8.**

**A,B,G,H**, Quantification of NMJs including (A) typical bouton number, (B) small bouton number, (G) synaptic terminal area and (H) the bouton size index for indicated genotypes ( $n \geq 23$  for A,B and  $n \geq 22$  for G,H). **C,D**, Quantification of the size of T-bar of small bouton from control [CS], *trio*<sup>-/-</sup> mutant and *iGluR*<sup>MUT</sup> mutant ( $n \geq 10$ ). **E,F**, Quantification of the mEPSP integral for indicated genotypes ( $n \geq 10$  for E and  $n \geq 8$  for F). Control is [CS] (for A-E) and [*cpx*<sup>Df/+</sup>] (for F). All quantification data are normalized to control. Detailed description of used genotypes are followed, Control [CS], Control(*cpx*) [*cpx*<sup>Df/+</sup>], *trio*<sup>-/-</sup> mutant [*trio*<sup>-/-</sup>], *trio*<sup>-/-</sup> + UAS-Trio [*UAS-Trio/+;+/OK319-Gal4;trio*<sup>-/-</sup>], *iGluR*<sup>WT</sup> [*dglurIIA*<sup>Hypo/-</sup>,*IIB*<sup>Df/-</sup>;+/genomic-*dglurIIA*<sup>WT</sup>], *iGluR*<sup>MUT</sup> [*dglurIIA*<sup>Hypo/-</sup>,*IIB*<sup>Df/-</sup>;+/genomic-*dglurIIA*<sup>E783A1</sup>], *iGluR*<sup>WT</sup> + *trio*<sup>-/-</sup> [*dglurIIA*<sup>Hypo/-</sup>,*IIB*<sup>Df/-</sup>; *trio*<sup>-/-</sup>,genomic-*dglurIIA*<sup>WT</sup>], *iGluR*<sup>MUT</sup> + *trio*<sup>-/-</sup> [*dglurIIA*<sup>Hypo/-</sup>,*IIB*<sup>Df/-</sup>; *trio*<sup>-/-</sup>,genomic-*dglurIIA*<sup>E783A1</sup>], *iGluR*<sup>WT</sup> + UAS-Trio [*dglurIIA*<sup>Hypo/-</sup>,*IIB*<sup>Df/-</sup>,*OK319-Gal4;UAS-Trio/genomic-dglurIIA*<sup>WT</sup>], *iGluR*<sup>WT</sup> + UAS-Rac1<sup>WT</sup> [*dglurIIA*<sup>Hypo/-</sup>,*IIB*<sup>Df/-</sup>,*OK319-Gal4;UAS-Rac1*<sup>WT</sup>/*genomic-dglurIIA*<sup>WT</sup>] and *iGluR*<sup>WT</sup> + UAS-Rac1<sup>Act</sup> [*dglurIIA*<sup>Hypo/-</sup>,*IIB*<sup>Df/-</sup>,*OK319-Gal4;UAS-Rac1*<sup>V12</sup>/*genomic-dglurIIA*<sup>WT</sup>]. All error bars indicate  $\pm$  s.e.m. \* = $p < 0.05$ , \*\* =  $p < 0.01$ , \*\*\* =  $p < 0.001$ .

## Supplemental Methods

### Genetics

The following Gal4 stocks were used: **OK319-Gal4** (Beck et al., 2012). OK319-Gal4 is expressed only in the ISN subset of motor neurons (MNs) that includes the motor neurons innervating muscle 4 (morphological analysis), muscles 6 & 7 (morphological & electrophysiological analysis) and muscles 1 & 9 (time-lapse live imaging) beginning in late embryos and continuing throughout larval development until pupation, **OK6-Gal4** - Expressed in all larval MNs from late embryos to pupation (Aberle et al., 2002), **D42-Gal4** - Expressed in all larval MNs (Yeh et al., 1995), **G14-Gal4** - Expressed in larval muscles including muscle 4, 6 and 7 (Aberle et al., 2002), **C57-Gal4** - Expressed in larval muscles including muscle 4, 6 and 7 (Budnik et al., 1996), **H94-Gal4,nSyb-Gal80** – Expressed in subset of larval muscles including muscles 6 but not muscle 7 (Davis and Goodman, 1998; Rubinstein et al., 2010). Specificity throughout development was confirmed by crossing with *tub<sup>P</sup>>stop>Gal4*, *UAS-FLP*, *UAS-CD8-GFP* (Figure S7A) (Roy et al., 2007).

The following existing transgenic stocks were used: **UAS-TeTxLC** [TNTE] (Sweeney et al., 1995), **UAS-Vglut-RNAi** (UAS-Vglut-RNAi<sup>JF</sup>, JF02689, target 1278-1724nt of *vglut* transcript) (Figure 1,S1), (UAS-Vglut-RNAi<sup>HMS</sup>, HMS02011, target 3077-3098nt), (Ni et al., 2008) (Figure S1) or (UAS-Vglut-RNAi<sup>KK</sup>, VDRC104324, target 1279-1900nt) (Dietzl et al., 2007), (Figure 1,4,S1,S5), **UAS-Vglut** (Daniels et al., 2004), **genomic-dglurIIA<sup>WT</sup>** (DiAntonio et al., 1999), **genomic-dglurIIAΔ3UTR** (Schmid et al., 2006), **genomic-dglurIIA<sup>E783A</sup>** (Schmid et al., 2006), **UAS-CamKII<sup>Act</sup>** (UAS-CamKII<sup>T287D</sup>) (Haghighi et al., 2003), **UAS-CamKII<sup>Inh</sup>** (UAS-CamKIIIn tide) (Haghighi et al., 2003), **UAS-Cpx** (Huntwork and Littleton, 2007), **Vglut-LexA** (Baek et al.,

2013), **LexOp-CD8-GFP** (Baek et al., 2013), **UAS-Trio** (Bateman et al., 2000), **UAS-Rac1<sup>WT</sup>** (Luo et al., 1994), **UAS-Rac1<sup>Act</sup>** (UAS-Rac1<sup>V12</sup>) (Luo et al., 1994).

The following mutant allele stocks were used: ***dglurIIA<sup>-</sup>,B<sup>-</sup>*** (*dglurIIA,B<sup>sp22</sup>* = *dglurIIA* and *dglurIIB* double null mutant)(DiAntonio et al., 1999), ***dglurIIA<sup>Df</sup>,B<sup>Df</sup>*** (*Df(2L)cl<sup>h4</sup>* = deficiency covering both *dglurIIA* and *dglurIIB*) (DiAntonio et al., 1999), ***dglurIIA<sup>Hypo</sup>,B<sup>Df</sup>*** (*Df(2L)cl<sup>h4</sup>*,genomic-*dglurIIAΔ3UTR*), ***vglut<sup>Hypo</sup>*** (*vglut<sup>1</sup>* = *vglut* hypomorphic allele) (Daniels et al., 2006), ***vglut<sup>Df</sup>*** (*vglut<sup>OK371ΔD</sup>* = small deficiency covering *vglut*) (Mahr and Aberle, 2006), ***cpx<sup>-</sup>*** (*cpx<sup>SH1</sup>* = *cpx* null allele) (Huntwork and Littleton, 2007), ***cpx<sup>1257</sup>*** (Iyer et al., 2013), ***cpx<sup>Df</sup>*** (*Df(3R)ED5021* = deficiency covering *cpx*) (Huntwork and Littleton, 2007), ***trio<sup>-</sup>*** (*trio<sup>S137203</sup>* = *trio* null allele) (Bateman et al., 2000).

The following allelic combinations were used (DiAntonio et al., 1999; Schmid et al., 2006; Steinert et al., 2006): **CS:** CantonS, ***dglurIIA<sup>+/-</sup>,IIB<sup>-/Df</sup>*** (Control in Figure 2): ***dglurIIA,B<sup>sp22</sup>/Df(2L)cl<sup>h4</sup>;+/genomic-dglurIIA<sup>WT</sup>***, ***dglurIIA<sup>Hypo/-</sup>,IIB<sup>-/Df</sup>***: ***dglurIIA,B<sup>sp22</sup>/Df(2L)cl<sup>h4</sup>,genomic-dglurIIAΔ3UTR***, ***iGluR<sup>WT</sup>***: ***dglurIIA,B<sup>sp22</sup>/Df(2L)cl<sup>h4</sup>,genomic-dglurIIAΔ3UTR;+/genomic-dglurIIA<sup>WT</sup>***, ***iGluR<sup>MUT</sup>***: ***dglurIIA,B<sup>sp22</sup>/Df(2L)cl<sup>h4</sup>,genomic-dglurIIAΔ3UTR;+/genomic-dglurIIA<sup>E783A</sup>***, **Control (*vglut*) or *vglut<sup>Df/+</sup>***: ***vglut<sup>OK371ΔD</sup>/+***, ***vglut<sup>MN</sup>***: ***vglut<sup>1</sup>,UAS-Vglut-vRNAi<sup>VDR104324</sup>/vglut<sup>OK371ΔD</sup>;D42-Gal4/UAS-Vglut-RNAi<sup>JF02689</sup>***, **Vglut-RNAi#1:** ***UAS-Vglut-RNAi<sup>VDR104324</sup>/+;UAS-Vglut-RNAi<sup>JF02689</sup>/D42-Gal4***, **Vglut-RNAi#2:** ***OK6-Gal4/+;D42-Gal4/UAS-Vglut-RNAi<sup>HMS</sup>***, ***vglut<sup>Hypo/Df</sup>*** : ***vglut<sup>1</sup>/vglut<sup>OK371ΔD</sup>*** ,**Control (*cpx*) or *cpx<sup>Df/+</sup>***: ***Df(3R)ED5021/+***, ***cpx<sup>-/-</sup>***: ***Df(3R)ED5021/cpx<sup>SH1</sup>***, ***cpx<sup>1257/-</sup>***: ***Df(3R)ED5021/cpx<sup>1257</sup>*** , , ***trio<sup>-/-</sup>***: ***trio<sup>S137203</sup>/trio<sup>S137203</sup>***. Controls used for each genotype are in figure legends and/or Table S1.

## Molecular Biology.

The following transgenes were constructed:

**UAS-dGluR<sup>WT</sup>** – Full length *dglurIIA* cDNA.

**UAS-dGluR<sup>DN</sup>** – *dglurIIA* cDNA with Glutamic acid at position 783 mutated to Alanine. This mutation results in a receptor that is correctly localized but non-functional (Schmid et al., 2006).

**UAS-rGluK2** – Full length rat GluK2 cDNA (gift from Dr. R.E. Oswald, Cornell University, Ithaca, NY).

**UAS-PLTXII** and **UAS- $\delta$ ACTX**. – These membrane-tethered toxins are expressed as chimeric fusion proteins comprising (from N to C termini), the secretory signal sequence from Lynx1, native mammalian prototoxin, mature cleaved peptide toxin sequence, glycine-asparagine repeat hydrophilic linker and the Lynx1 GPI targeting sequence (Wu et al., 2008). The complete amino sequence for both toxin peptides are

PLTXII:

MSALLLILALVGAAVAADCSATGDTCDHTKKCCDDCYTCRCGTPWGANCRCDYKARCDTGNG  
NGNGNGEQKLISEEDlgNGNGNGNGNGNGNGDGNNGGALCNGAGFATPVTALVPALLATFWS  
LL\*

$\delta$ ACTX:

MSALLLILALVGAAVACAKKRNWCGKTEDCCCPMKCVYAWYNEQGSCQSTISALWKKCGNGN  
GNGNGEQKLISEEDlgNGNGNGNGNGNGNGDGNNGGALCNGAGFATPVTALVPALLATFWSLL

\*

dGluR<sup>WT</sup>, dGluR<sup>DN</sup> and rGluK2 were cloned into pBID-UAS-G and transgenes generated using Phi3C1 site-directed transgenesis (Wang et al., 2012). PLTXII and  $\delta$ ACTX were cloned into pUAST (Brand and Perrimon, 1993) and transgenes generated using conventional P-element transgenesis.

## **Electrophysiology**

Intracellular recordings from muscle 6, segment A3 or A4 were performed as previously described (Imlach and McCabe, 2009; McCabe et al., 2003) except for Figure S7 where muscle 6 or 7, segment A3 was used. Briefly, third instar larvae were dissected (0.1mM Ca<sup>2+</sup>) and recordings carried out in HL3 saline containing 1.5mM Ca<sup>2+</sup> (physiologically relevant Ca<sup>2+</sup> concentration). Data was only analyzed from recordings where the resting membrane potential was less than -55 mV. Recordings were performed using an Axoclamp 2B amplifier. Data were low-pass filtered at 1 kHz, digitized, and recorded to disk using a Digidata 1322A interface. eEPSPs, mEPSPs amplitudes, frequency and integrals were measured using the peak detection feature of MiniAnalysis program (Synaptosoft, Inc.). For early first instar larvae recordings, larvae were dissected (0.1mM Ca<sup>2+</sup>) and recorded in HL3 saline containing 1.0 mM Ca<sup>2+</sup>. Muscle 6 was whole-cell voltage clamped and mini EPSCs were recorded for 2 min at a holding potential of -80mV. eEPSCs were evoked by stimulating the appropriate segmental nerve with a pulse of 5-8 V that lasted 1ms using a suction electrode. Recordings were made using a Multiclamp 700B amplifier controlled by pClamp 10.2 (Molecular Devices, Sunnyvale, CA). Sampling frequency was 20kHz and traces were filtered at 10kHz. Data was analysed in Clampfit 10.2, mEPSCs were detected semi-automatic and amplitudes were measured using the event detection tool. **Quantal content** was calculated for each individual recording by calculating (eEPSP amplitude / mEPSP amplitude) (Frank et al., 2006) after correction for nonlinear summation errors (Martin, 1955).

## **Immunohistochemistry**

Wandering third instar larva of comparable size were collected, dissected, and stained as previously described (Brent et al., 2009a; Brent et al., 2009b; McCabe et al., 2003). Briefly,

animals were dissected in 1x PBS (Mediatech) and fixed for 20 minutes in 4% formaldehyde (Sigma-Aldrich). Animals were washed multiple times in PBT (PBS + 0.1% Triton) and then blocked in PBTB (PBT + 0.2% BSA) and PBTN (PBTB+ 2% Normal Goat Serum). Primary antibodies used were mouse anti-Dlg (1:500; Developmental Studies Hybridoma Bank (DSHB) at the University of Iowa), mouse anti-Brp (Wagh et al., 2006) (Nc82, 1:100; DSHB), mouse anti-FasII (1D4, 1:500; DSHB), rabbit anti-Syt1 (1:1000, gift from Troy Littleton, M.I.T., Cambridge, MA), rabbit anti-GluR6/GluK2 (1:1000, Millipore) and rabbit anti-DGluRIII/IIC (Marrus et al., 2004) (1:500, gift from Aaron DiAntonio, Washington University, Saint Louis, MO). Animals were incubated overnight at 4°C in primary antibodies, washed in PBTB and PBTN, and then incubated in secondary antibodies for 2 hours at room temperature. Secondary antibodies used included goat anti-mouse Alexa-488 (1:1000; Invitrogen), goat anti-rabbit Alexa-555 (1:1000; Invitrogen), goat anti-mouse Cy3 (1:1000; Jackson ImmunoResearch) and Cy5 conjugated HRP (1:400; Jackson ImmunoResearch). Imaging was carried out on Zeiss 510 confocal microscope. To compare intensity levels, experimental and control animals were stained in the same tube and imaged using identical confocal settings and then a maximum projection rendering of z-stacks was analyzed for signal intensity using MetaMorph software (Molecular Devices, Downingtown, PA). Synaptic area was identified by HRP. Intensity was normalized against HRP. For Figure S1D, **the relative frequency histogram of the distribution of bouton sizes**, boundaries of individual boutons were identified manually while blinded to genotype, by using round regional tool of MetaMorph software.

### **Time-lapse live imaging**

Presynaptic motor neurons were labeled with membrane localized LexOp-CD8-GFP expressed by vglut-LexA in both control and mutant backgrounds. All glutamatergic neurons including all type I motor neurons were labeled. Animals were anesthetized by ~15 minute exposure to a



vapor mixture of 35% Methyl Salicylate and 16% Menthol (Haw Par Healthcare Ltd., Singapore) every 24 hours from the second instar onwards for 4 days. For imaging, larva were placed on a slide with 70% glycerol and cover slip. Imaging time was limited to less than 30 minutes after which animals were washed gently with PBS, allowed to recover and returned to the food media. Mutants and corresponding controls were imaged on the same day in a random order to minimize handling variability. For each time point, confocal images (63x, oil immersion lens) of an NMJ terminal z-stack were captured. Type Ib NMJ terminal on muscle 1 or 9 of segment A3 to A6 were chosen for imaging due to exterior localization of these NMJs in muscle field and labeling by the OK319-Gal4 driver. After time-lapse imaging was complete, each animal was dissected, fixed and stained by HRP and Dlg to confirm bouton type. Only images from animals that survived the entire 4-day imaging procedure were included in analysis. For **bouton size expansion in live images**, the size of each bouton was measured using the round regional tool of MetaMorph software while blinded to genotype. Only initial sizes smaller than  $2\mu\text{m}^2$  (categorized as small bouton) were subjected for analysis throughout imaging period. For **the bouton formation in live images**, only most distal bouton was used for analysis which can be reliably recognized in live imaging. The number of new boutons added between 0h to 72h were counted. For **bouton elimination**, the number of boutons that were lost during 24h to 72h were counted. No bouton re-appeared once eliminated during the imaging period.

### **Electron microscopy**

Fillets from third instar larvae were dissected in HL3 without  $\text{Ca}^{2+}$  (Jiao et al., 2010a; Jiao et al., 2010b; McCabe et al., 2003). Fillets were then incubated in HL3 buffer containing EDTA for 10 min for resting conditions. The specimens were fixed in 3% glutaraldehyde and 0.5% paraformaldehyde in PBS (pH 7.2) overnight in cold room. Fillets were washed with PBS and postfixed in 1%  $\text{OsO}_4$ , dehydrated in alcohol, and embedded in Durcupan ACM (Fluka). Serial

ultrathin sections were cut with a diamond knife (Diatome), collected on grids and stained with 1% uranyl acetate and lead citrate. The grids were then examined with a JEOL 1200 electron microscope. Images were quantified with NIH ImageJ software.

### **Supplemental References**

Aberle, H., Haghighi, A.P., Fetter, R.D., McCabe, B.D., Magalhães, T.R., and Goodman, C.S. (2002). wishful thinking encodes a BMP type II receptor that regulates synaptic growth in *Drosophila*. *Neuron* 33, 545-558.

Baek, M., Enriquez, J., and Mann, R.S. (2013). Dual role for Hox genes and Hox co-factors in conferring leg motoneuron survival and identity in *Drosophila*. *Development* 140, 2027-2038.

Bateman, J., Shu, H., and Van Vactor, D. (2000). The guanine nucleotide exchange factor trio mediates axonal development in the *Drosophila* embryo. *Neuron* 26, 93-106.

Beck, E.S., Gasque, G., Imlach, W.L., Jiao, W., Jiwon Choi, B., Wu, P.-S., Kraushar, M.L., and McCabe, B.D. (2012). Regulation of Fasciclin II and synaptic terminal development by the splicing factor beag. *J Neurosci* 32, 7058-7073.

Brand, A.H., and Perrimon, N. (1993). Targeted gene expression as a means of altering cell fates and generating dominant phenotypes. *Development* 118, 401-415.

Brent, J., Werner, K., and McCabe, B.D. (2009a). *Drosophila* larval NMJ immunohistochemistry. *Journal of visualized experiments : JoVE*, e1108.

Brent, J.R., Werner, K.M., and McCabe, B.D. (2009b). *Drosophila* larval NMJ dissection. *Journal of visualized experiments : JoVE*, e1107.

Budnik, V., Koh, Y.H., Guan, B., Hartmann, B., Hough, C., Woods, D., and Gorczyca, M. (1996). Regulation of synapse structure and function by the *Drosophila* tumor suppressor gene *dlg*. *Neuron* 17, 627-640.

Daniels, R.W., Collins, C.A., Chen, K., Gelfand, M.V., Featherstone, D.E., and DiAntonio, A. (2006). A single vesicular glutamate transporter is sufficient to fill a synaptic vesicle. *Neuron* 49, 11-16.

Daniels, R.W., Collins, C.A., Gelfand, M.V., Dant, J., Brooks, E.S., Krantz, D.E., and DiAntonio, A. (2004). Increased expression of the *Drosophila* vesicular glutamate transporter leads to excess glutamate release and a compensatory decrease in quantal content. *J Neurosci* 24, 10466-10474.

Davis, G.W., and Goodman, C.S. (1998). Synapse-specific control of synaptic efficacy at the terminals of a single neuron. *Nature* 392, 82-86.

DiAntonio, A., Petersen, S.A., Heckmann, M., and Goodman, C.S. (1999). Glutamate receptor expression regulates quantal size and quantal content at the *Drosophila* neuromuscular junction. *J Neurosci* 19, 3023-3032.

Dietzl, G., Chen, D., Schnorrer, F., Su, K.-C., Barinova, Y., Fellner, M., Gasser, B., Kinsey, K., Oppel, S., Scheiblauer, S., *et al.* (2007). A genome-wide transgenic RNAi library for conditional gene inactivation in *Drosophila*. *Nature* 448, 151-156.

Frank, C.A., Kennedy, M.J., Goold, C.P., Marek, K.W., and Davis, G.W. (2006). Mechanisms underlying the rapid induction and sustained expression of synaptic homeostasis. *Neuron* 52, 663-677.

Haghighi, A.P., McCabe, B.D., Fetter, R.D., Palmer, J.E., Hom, S., and Goodman, C.S. (2003). Retrograde control of synaptic transmission by postsynaptic CaMKII at the *Drosophila* neuromuscular junction. *Neuron* 39, 255-267.

Huntwork, S., and Littleton, J.T. (2007). A complexin fusion clamp regulates spontaneous neurotransmitter release and synaptic growth. *Nat Neurosci* 10, 1235-1237.

Imlach, W., and McCabe, B.D. (2009). Electrophysiological methods for recording synaptic potentials from the NMJ of *Drosophila* larvae. *Journal of visualized experiments : JoVE*, e1109.

Iyer, J., Wahlmark, C.J., Kuser-Ahnert, G.A., and Kawasaki, F. (2013). Molecular mechanisms of COMPLEXIN fusion clamp function in synaptic exocytosis revealed in a new *Drosophila* mutant. *Mol Cell Neurosci* 56C, 244-254.

Jiao, W., Masich, S., Franzén, O., and Shupliakov, O. (2010a). Two pools of vesicles associated with the presynaptic cytosolic projection in *Drosophila* neuromuscular junctions. *J Struct Biol* 172, 389-394.

Jiao, W., Shupliakov, A., and Shupliakov, O. (2010b). A semi-correlative technique for the subcellular localization of proteins in *Drosophila* synapses. *J Neurosci Methods* 185, 273-279.

Luo, L., Liao, Y.J., Jan, L.Y., and Jan, Y.N. (1994). Distinct morphogenetic functions of similar small GTPases: *Drosophila* Drac1 is involved in axonal outgrowth and myoblast fusion. *Genes Dev* 8, 1787-1802.

Mahr, A., and Aberle, H. (2006). The expression pattern of the *Drosophila* vesicular glutamate transporter: a marker protein for motoneurons and glutamatergic centers in the brain. *Gene Expr Patterns* 6, 299-309.

Marrus, S.B., Portman, S.L., Allen, M.J., Moffat, K.G., and DiAntonio, A. (2004). Differential localization of glutamate receptor subunits at the *Drosophila* neuromuscular junction. *J Neurosci* 24, 1406-1415.

Martin, A.R. (1955). A further study of the statistical composition on the end-plate potential. *J Physiol (Lond)* 130, 114-122.

McCabe, B.D., Marqués, G., Haghghi, A.P., Fetter, R.D., Crotty, M.L., Haerry, T.E., Goodman, C.S., and O'Connor, M.B. (2003). The BMP homolog *Gbb* provides a retrograde signal that regulates synaptic growth at the *Drosophila* neuromuscular junction. *Neuron* 39, 241-254.

Ni, J.-Q., Markstein, M., Binari, R., Pfeiffer, B., Liu, L.-P., Villalta, C., Booker, M., Perkins, L., and Perrimon, N. (2008). Vector and parameters for targeted transgenic RNA interference in *Drosophila melanogaster*. *Nat Methods* 5, 49-51.

Roy, B., Singh, A.P., Shetty, C., Chaudhary, V., North, A., Landgraf, M., Vijayraghavan, K., and Rodrigues, V. (2007). Metamorphosis of an identified serotonergic neuron in the *Drosophila* olfactory system. *Neural Dev* 2, 20.

Rubinstein, C.D., Rivlin, P.K., and Hoy, R.R. (2010). Genetic feminization of the thoracic nervous system disrupts courtship song in male *Drosophila melanogaster*. *J Neurogenet* 24, 234-245.

Schmid, A., Qin, G., Wichmann, C., Kittel, R.J., Mertel, S., Fouquet, W., Schmidt, M., Heckmann, M., and Sigrist, S.J. (2006). Non-NMDA-type glutamate receptors are essential for maturation but not for initial assembly of synapses at *Drosophila* neuromuscular junctions. *J Neurosci* 26, 11267-11277.

Steinert, J.R., Kuromi, H., Hellwig, A., Knirr, M., Wyatt, A.W., Kidokoro, Y., and Schuster, C.M. (2006). Experience-dependent formation and recruitment of large vesicles from reserve pool. *Neuron* 50, 723-733.

Sweeney, S.T., Broadie, K., Keane, J., Niemann, H., and O'Kane, C.J. (1995). Targeted expression of tetanus toxin light chain in *Drosophila* specifically eliminates synaptic transmission and causes behavioral defects. *Neuron* 14, 341-351.

Wagh, D.A., Rasse, T.M., Asan, E., Hofbauer, A., Schwenkert, I., Dürrbeck, H., Buchner, S., Dabauvalle, M.-C., Schmidt, M., Qin, G., *et al.* (2006). Bruchpilot, a protein with homology to ELKS/CAST, is required for structural integrity and function of synaptic active zones in *Drosophila*. *Neuron* 49, 833-844.

Wang, J.-W., Beck, E.S., and McCabe, B.D. (2012). A modular toolset for recombination transgenesis and neurogenetic analysis of *Drosophila*. *PLoS ONE* 7, e42102.

Wu, Y., Cao, G., Pavlicek, B., Luo, X., and Nitabach, M.N. (2008). Phase coupling of a circadian neuropeptide with rest/activity rhythms detected using a membrane-tethered spider toxin. *PLoS Biol* 6, e273.

Yeh, E., Gustafson, K., and Boulianne, G.L. (1995). Green fluorescent protein as a vital marker and reporter of gene expression in *Drosophila*. *Proc Natl Acad Sci USA* 92, 7036-7040.
